# 1 **Decoding neuronal diversity by single-cell Convert-seq**

2 Joachim Luginbühl<sup>1,2</sup>, Tsukasa Kouno<sup>1,2</sup>, Rei Nakano<sup>1,3,4</sup>, Thomas E Chater<sup>5</sup>, Divya M Sivaraman<sup>1,2,6</sup>,  
3 Mami Kishima<sup>1,3</sup>, Filip Roudnicky<sup>7</sup>, Piero Carninci<sup>1,8</sup>, Charles Plessy<sup>1,8</sup>, Jay W Shin<sup>1,2,9,\*</sup>

4  
5 <sup>1</sup>RIKEN Center for Life Science Technologies, Division of Genomic Technologies, RIKEN Yokohama, 230-0045,  
6 Japan; <sup>2</sup>RIKEN Center for Integrative Medical Sciences, Laboratory for Advanced Genomic Circuits, RIKEN  
7 Yokohama, 230-0045, Japan; <sup>3</sup>RIKEN Center for Integrative Medical Sciences, Laboratory for Cellular Function  
8 Conversion Technology, RIKEN Yokohama, 230-0045, Japan; <sup>4</sup>Nihon University College of Bioresource Sciences,  
9 Department of Veterinary Medicine, Laboratory of Veterinary Biochemistry, 252-0880, Japan; <sup>5</sup>RIKEN Center for  
10 Brain Science, Laboratory for Synaptic Plasticity and Connectivity, RIKEN Wako, 351-0198, Japan; <sup>6</sup>Sree Chitra  
11 Tirunal Institute for Medical Sciences and Technology, Thiruvananthapuram, Kerala, 695011, India; <sup>7</sup>Institute of  
12 Pharmaceutical Sciences, ETH Zurich, Zurich, Switzerland; <sup>8</sup>RIKEN Center for Integrative Medical Sciences,  
13 Laboratory for Single Cell Technologies, RIKEN Yokohama, 230-0045, Japan; <sup>9</sup>Lead contact

14  
15 \*Materials and correspondence: [Jay.Shin@riken.jp](mailto:Jay.Shin@riken.jp)

## 17 **Summary**

18 **The conversion of cell fates is controlled by hierarchical gene regulatory networks (GRNs) that**  
19 **induce remarkable alterations in cellular and transcriptome states. The identification of key**  
20 **regulators within these networks from myriad of candidate genes, however, poses a major**  
21 **research challenge. Here we present Convert-seq, combining single-cell RNA sequencing**  
22 **(scRNA-seq) and pooled ectopic gene expression with a new strategy to discriminate**  
23 **sequencing reads derived from exogenous and endogenous transcripts. We demonstrate**  
24 **Convert-seq by associating hundreds of single cells during reprogramming of human**  
25 **fibroblasts to induced neurons (iN) with exogenous and endogenous transcriptional signatures.**  
26 **Convert-seq identified GRNs modulating the emergence of developmental trajectories and**  
27 **predicted combinatorial activation of exogenous transcription factors controlling iN subtype**  
28 **specification. Functional validation of iN subtypes generated by novel combinations of**  
29 **exogenous transcription factors establish Convert-seq as a broadly applicable workflow to**  
30 **rapidly identify key transcription factors and GRNs orchestrating the reprogramming of virtually**  
31 **any cell type.**

## 32 **Introduction**

33 Fully differentiated cells can be reprogrammed to alternative fates via ectopic expression of defined  
34 combinations of transcription factors and/or microRNAs (Chanda et al., 2014; Hu et al., 2015; Mertens  
35 et al., 2015; Pang et al., 2011; Pfisterer et al., 2011; Ryoji Amamoto and Arlotta, 2014; Victor et al.,  
36 2014; Vierbuchen et al., 2010; Xue et al., 2013). Reprogrammed cells offer invaluable alternative routes  
37 for the treatment of various diseases and represent a substantial improvement to the field of disease  
38 modeling (Masserdotti et al., 2016). However, despite the establishment of new *in silico* prediction tools  
39 (Rackham et al., 2016), it has remained a challenge to identify essential genetic drivers that determine  
40 specific subtypes of cells during reprogramming.

41 Cell reprogramming is of particular interest for human neurons, which are notoriously difficult  
42 to obtain from patients and cannot be expanded in culture (Ryoji Amamoto and Arlotta, 2014). Since  
43 the first report on reprogramming of induced neurons (iN), several studies have succeeded in identifying  
44 defined combinations of neurogenic transcription factors that allow the reprogramming of specific  
45 neuronal subtypes (Masserdotti et al., 2016). For instance, distinct sets of neurogenic transcription  
46 factors have been shown to create dopaminergic neurons and cholinergic motor neurons that are  
47 selective targets of degeneration in patients with Parkinson's disease and amyotrophic lateral sclerosis  
48 (ALS), respectively (Caiazzo et al., 2011; Jiang et al., 2015; Kim et al., 2011; Liu et al., 2013, 2016;  
49 Mazzoni et al., 2013; Pfisterer et al., 2011; Son et al., 2011). However, an inherent limitation of studies  
50 aiming to identify key transcription factors controlling cell reprogramming is that the identification of  
51 candidates from myriad of transcription factors still is based on trial and error. This is exacerbated by  
52 the time and labor intensive retesting and validation of newly identified candidates. Pooled screens,  
53 instead of one-by-one tests, offer a more efficient and scalable strategy, but they either rely on simple  
54 phenotypic readouts or require specific markers to enrich for target cell populations, which are often not  
55 available (Chen et al., 2015; Hsu et al., 2014; Liu et al., 2018; Shalem et al., 2015). This is particularly  
56 problematic with regard to reprogramming, which is intrinsically inefficient, resulting in heterogenous  
57 cell populations containing unreprogrammed, partially reprogrammed, and successfully reprogrammed  
58 cells.

59 To address this challenge, we developed Convert-seq, combining ectopic expression of  
60 transcription factors with single-cell RNA sequencing (scRNA-seq) to retrospectively associate single  
61 cells with their exogenous and endogenous expression profiles. Convert-seq represents a pooled

62 (multiplexed) screening strategy that allows to identify transcription factors and GRNs governing the  
63 reprogramming of many different celltypes in a single experiment. We demonstrate Convert-seq in iN  
64 generated by the pooled infection of human fibroblasts with 20 pro-neuronal transcription factors using  
65 two single-cell sequencing platforms, the Fluidigm C1 system based on microfluidic technology and the  
66 10x Genomics system based on nano-droplets. By association of different transcriptional states and  
67 developmental trajectories emerging during reprogramming with distinct exogenous and endogenous  
68 transcriptional signatures, we identified defined combinations of key transcription factors orchestrating  
69 the reprogramming of human fibroblasts into multiple neuronal subtypes. Our data demonstrate the  
70 ability of Convert-seq to efficiently gain rich insight into biological processes governing cell plasticity  
71 and cell fate decisions and to systematically dissect GRNs controlling subtype specification during cell  
72 reprogramming.

73

## 74 **Results**

75

### 76 **Generation of a heterogenous population of human induced neurons**

77 To enable systematic identification of combinations of transcription factors governing the  
78 reprogramming of human fibroblasts into specific neuronal subtypes, we generated a pool of lentiviruses  
79 (hereafter termed transcription factor-pool or TF-pool) encoding 20 pro-neuronal transcription factors.  
80 We included the pioneer factor *ASCL1* (Wapinski et al., 2013) and several transcription factors that  
81 increase the efficiency of neuronal reprogramming (*POU3F2*, *ZIC1*, *OLIG2*, *NEUROD1*) (Pang et al.,  
82 2011; Vierbuchen et al., 2010). To promote reprogramming of different subtypes of neurons, we further  
83 included transcription factors which have been previously shown to convert human fibroblasts into  
84 GABAergic (*DLX1*, *DLX2*) (Victor et al., 2014), cholinergic (*NEUROG2*, *ISL1*) (Liu et al., 2013; Son et  
85 al., 2011), serotonergic (*FEV*) (Xu et al., 2016) or dopaminergic (*FOXA2*, *NR4A2*, *PITX3*) (Liu et al.,  
86 2012; Pfisterer et al., 2011) neurons when co-expressed with other transcription factors. Additionally,  
87 we selected 7 transcription factors which have not yet been used to generate specific neuronal  
88 subtypes, but showed significant up-regulation during the differentiation of human induced pluripotent  
89 stem cells (iPSC) into neuronal progenitor cells (NPC) (Figure S1A). Each transcription factor was  
90 expressed under the elongation factor 1 alpha (EF1A) promoter together with a gene encoding Venus  
91 yellow fluorescent protein (YFP) (Figure S1B). Based on quantifications of YFP expression, we tuned

92 the multiplicity of infection (MOI) of each lentivirus to allow ~85% of fibroblasts to express mixed  
93 combinations of 2 - 6 transcription factors after stochastic infection with the TF-pool (Figure 1A and  
94 Figure S1C). Using successive application of neuronal induction medium for 14 days followed by  
95 neuronal maturation medium for 7 days, we successfully transformed fibroblasts into cells exhibiting  
96 heterogeneous neuronal morphologies and expressing canonical neuronal marker genes (Figures 1B).  
97 At 9 days post-infection (dpi), 78.6% of fibroblasts (hereafter termed transcription factor-induced cells  
98 or TFi) stained positive for the immature neuronal marker TUBB3 and 34.7% expressed MAP2, a  
99 microtubule-associated protein expressed specifically in neurons (Jeff et al., 1988) (Figure 1C). By 21  
100 dpi, TUBB3+ and MAP2+ ratios increased to 93.5% and 42.4%, respectively, indicating progressive  
101 differentiation towards the neuronal lineage. Consistent with the adoption of a neuronal fate, quantitative  
102 polymerase chain reaction (qPCR) revealed gradual upregulation of pan-neuronal marker genes  
103 (*MAP2*, *NRCAM*, *NEUN*, *SYN1*) and established neuronal subtype marker genes (*SLC17A7*  
104 [glutamatergic neurons], *GABRA1* [GABAergic neurons], *TH* [dopaminergic neurons] and *CHAT*  
105 [cholinergic neurons]) as well as gradual downregulation of fibroblast marker gene expression (*VIM*,  
106 *SNAI1*) in TFi starting at 7 dpi (Figures 1D).

107 Previous studies have shown that mouse and human fibroblasts can be directly converted to  
108 induced neurons (iN) solely by chemical cocktails of small molecules (Hu et al., 2015; Li et al., 2015).  
109 Thus, to discriminate between transcription factor-mediated and chemical-mediated conversion, we  
110 separately cultured fibroblasts transduced with lentiviruses expressing YFP only (hereafter termed  
111 chemically induced cells or Ci) using the same neuronal induction regime. Interestingly, we found that  
112 similar to TFi, application of small molecules and growth factors alone induced the development of  
113 TUBB3+ neurites, upregulated the expression of *NEUN*, *SYN1*, *SLC17A7* and *TUBB3* and  
114 downregulated the expression of *VIM* and *SNAI1* in Ci (Figures 1B-1D). However, Ci failed to express  
115 *MAP2* at any time-point analyzed, indicating that the small molecules we used were insufficient to elicit  
116 neuronal maturation on their own. Consistently, neuronal complexity, measured as number of branch  
117 points and average neurite length, was significantly increased at 9 dpi (8.5-fold and 1.8-fold,  
118 respectively) and at 21 dpi (5.6-fold and 4.8-fold, respectively) when fibroblasts were infected with the  
119 TF-pool compared to application of small molecules alone (Figures S1E-S1F).

120

121 **Molecular characterization of induced neurons using scRNA-seq**

122 Immunofluorescence for canonical neuronal subtype markers at 21 dpi revealed that TFi differentiated  
123 into a heterogeneous population of cells expressing glutamatergic (vGLUT1+; ~29%), GABAergic  
124 (GABA+; ~23%), cholinergic (CHAT+; ~19%) and dopaminergic (TH+; ~4%) subtype-specific genes  
125 (Figures 1E-1F). In contrast, only ~15% of Ci expressed vGLUT1 at 21 dpi and none of the other  
126 subtype-specific genes was induced by small molecules.

127 To gain further insight into the molecular heterogeneity of TFi and Ci, we used droplet-based  
128 massively parallel scRNA-seq (Zheng et al., 2017) to profile 2,092 Ci and 1,900 TFi at 14 dpi (Table  
129 S1). Batch-corrected clustering of all cells that passed quality control using *t*-Distributed Stochastic  
130 Neighbor embedding (*t*-SNE) separated Ci and TFi along *t*-SNE 2 (Figures 2A and S2A-D). Correlation  
131 analysis of top genes along *t*-SNE 2 (Pearson correlation;  $p < 10^{-7}$ ) revealed activation of genes relevant  
132 for neuronal differentiation (*NRCAM*, *STMN2*, *SST*, *DKK3*) and synapse formation (*SYT1*, *SERPINI1*,  
133 *SYNGR1*, *SYNPO2*), which was accompanied by a decrease in fibroblast-specific genes (*SNAI2*,  
134 *THY1*) (Figure 2B). Other suppressed genes included extracellular matrix genes (*COL3A1*, *COL15A1*,  
135 *EDIL3*, *HAPLN1*, *CPXM1* and *MFAP4*), reflective of the morphological changes that occur during the  
136 conversion of iN. *t*-SNE further partitioned TFi cells into one main cluster (CL3) and several  
137 transcriptionally distinct clusters (CL4-CL9). CL5 dominantly expressed cell cycle-related genes  
138 including *MIK167* and *TOP2A* and showed enrichment of Gene ontology (GO) terms related to cell  
139 division, indicating that these cells – possibly un-reprogrammed fibroblasts – remained in a mitotic stage  
140 (Figures 2C-D; Table S2). Importantly, consistent with morphology and marker expression stainings,  
141 clusters CL4 and CL6 – CL9 all showed enrichment in terms related to nervous system development  
142 and neurogenesis. To annotate clusters CL4 – CL9, we interrogated top differentially expressed genes  
143 (Seurat;  $p < 10^{-20}$ ) for known neuronal subtype marker genes. This revealed CL4 to associate with  
144 immature neurons, CL6 with the motor neuron program (*CHRNA5*, *CP*), CL7 with the GABAergic  
145 neuron program (*ANK3*, *NKAIN4*), CL8 with the glutamatergic neuron program (*SLC6A17*, *INSM1*) and  
146 CL9 with the dopaminergic neuron program (*DRD4*, *SEMA3G*) (Figures 2E-F and S2E).

147 Together, these data revealed that transduction of our TF-pool converted fibroblasts into a  
148 population of cells exhibiting a high degree of heterogeneity and distinct neuronal subtype-specific  
149 molecular signatures.

150

## 151 **Convert-seq Detection of Exogenous and Endogenous Transcripts**

152 To decode the identity of exogenous transcription factors in individual cells, we designed Convert-seq,  
153 combining the stochastic nature of pooled, virus-based screens with massively parallel scRNA-seq  
154 (Figure 1A). Based on full-length reads, we extracted nucleotides at the 5' and 3' junctions of exogenous  
155 ORFs and assembled artificial transcript models of endogenous and exogenous reference sequences  
156 (Figure 3A). Alignment of reads to these specific 5' and 3' junctions allows to discriminate between  
157 exogenous and endogenous gene expression. To benchmark the accuracy and sensitivity of Convert-  
158 seq, we profiled gene expression of bulk fibroblasts infected with single transcription factors, two  
159 combinations of 10 transcription factors, and the complete TF-pool at two multiplicity of infections (MOI)  
160 (Figures 3B and S3A). We also included chemically-induced (Ci) cells and uninfected fibroblasts as  
161 controls. Sequence alignment to the artificial transcript model using Bowtie (Langmead et al., 2009)  
162 revealed specific detection of exogenous transcription factors, but resulted in 24.4% false-negative  
163 events, possibly due to the exclusion of multi-mapping reads (Figure 3C). To reduce the number of  
164 false-negative events, we implemented the pseudo-alignment tool Kallisto, providing the advantage of  
165 assigning multi-mapping reads to transcripts without pinpointing exactly how the sequences of the reads  
166 and transcripts align (Bray et al., 2016). Pseudoalignment with Kallisto reduced the occurrence of false  
167 negative events to 6.3% and yielded highly specific and sensitive detection efficiencies of 97.5% and  
168 87.5% in individual infection and pooled infection samples, respectively (Figures 3D and S3B).

169 To further confirm specific detection of lentivirus-mediated expression, we revealed significantly  
170 higher mean expression of exogenous transcription factors compared to the mean expression of  
171 corresponding endogenous transcription factors ( $p < 0.05$ ; Figure 3E). Interestingly, additional infection  
172 experiments revealed that for several genes, ectopic expression failed to activate endogenous  
173 expression, while we observed upregulation of endogenous *DLX1*, *DLX2*, *ISL1*, *NEUROD1*, *PAX6* and  
174 *ZIC1* transcripts after infection with their exogenous counterparts (Figure S3C).

175

## 176 **Induced neurons resemble primary human newborn neurons in global gene** 177 **expression**

178 Convert-seq requires full-length coverage of transcripts to obtain sequencing reads falling into specific  
179 5' and 3' junction sequences. Accordingly, detection of exogenous genes from the 3'-biased droplet-  
180 based scRNA-seq data was inefficient (Figure S3D). Therefore, we sequenced transcription factor-

181 induced cells (TFi) and chemically induced cells (Ci) at an early (9 dpi) and late (21 dpi) time point (216  
182 cells and 152 cells, respectively) on the Fluidigm C1 platform using Smartseq2 technology (Figure 4A).  
183 Unsupervised clustering of all cells that passed quality control using *t*-SNE identified 5 transcriptionally  
184 distinct clusters of cells that separated largely by type rather than batch (Figures 4B and S4A-F). GO  
185 analysis of differentially expressed genes between all clusters (fold-change > 2;  $p < 10^{-4}$ ) revealed that  
186 CL1 dominant in unreprogrammed fibroblasts specifically expressed genes related to cell cycle and cell  
187 division, whereas CL2 dominant in Ci at 9 dpi was characterized by specific expression of genes related  
188 to general developmental processes without bias towards nervous system development (Figures 4C  
189 and S4G-H; Table S3). CL3 dominant in TFi at 9 dpi expressed genes related to the inflammatory  
190 response and cell cycle regulation, indicating inefficient initiation of the reprogramming process. Similar  
191 to CL2, CL4 dominant in TFi at 21 dpi expressed genes related to general developmental processes.  
192 Finally, CL5 expressed genes related to neuron development and neuron maturation, suggesting that  
193 CL5 contained cells that were most efficiently reprogrammed towards the neuronal lineage.

194 As an alternative approach to assess reprogramming efficiency, we used a publicly available  
195 scRNA-seq dataset of human primary cortical and medial ganglionic eminence samples to infer lineage  
196 relationships among the cells in an adjacency network on the basis of pairwise correlations between  
197 cells (Nowakowski et al., 2017) (Figure 4D). This analysis revealed that while Ci correlated with  
198 alternative cell types including endothelial cells and mural cells, TFi showed progressive correlation with  
199 newborn neurons, excitatory neurons and inhibitory neurons. Consistent with our previous results  
200 (Figure S4G-H), we found that TFi exhibiting transcriptional profiles related to cell cycle regulation and  
201 inflammatory response showed stronger correlation with neuronal progenitors and newborn neurons,  
202 whereas the majority of TFi exhibiting transcriptional profiles related to neuron development and neuron  
203 maturation correlated with excitatory and inhibitory neurons (Figure 4E).

204

## 205 **Association of developmental trajectories with exogenous expression profiles**

206 A previous study in mouse embryonic fibroblasts showed that reprogramming to neurons occurs  
207 through a continuum of intermediate states, whereby ectopic expression of specific exogenous  
208 transcription factors is required to suppress aberrant developmental trajectories and maintain neuronal  
209 identity (Treutlein et al., 2016). To analyze intermediate states in our time-course data and  
210 simultaneously associate the expression of exogenous transcription factors with distinct developmental



211 trajectories during reprogramming, we first used single-cell Convert-seq to assign individual cells with  
212 exogenous transcription factors and corresponding endogenous gene expression profiles (Figure 4F).  
213 Next, we used the Monocle algorithm (Trapnell et al., 2014) to place the cells in pseudo-temporal order  
214 based on differentially expressed genes between 9 dpi and 21 dpi ( $qval < 0.01$ ) (Figure S5A). This  
215 revealed that cells bifurcated into two divergent developmental trajectories shortly after initiation of  
216 reprogramming. Using branch-specific differential gene expression (fold-change  $> 4$ ;  $p < 10^{-2}$ ), we found  
217 that branch 1 cells contained mostly TFi and Ci from 9 dpi and expressed genes involved in viral  
218 expression, ribosome biogenesis and cell cycle control, whereas branch 2 cells contained TFi and Ci  
219 from both 9 dpi and 21 dpi, and expressed genes related to nervous system development (Figures S5B-  
220 C; Table S4). Next, we correlated differentially expressed genes across pseudotime. Unexpectedly,  
221 positively correlating genes ( $r > 0.2$ ) were enriched for GO terms related to various developmental  
222 processes (Figures S5D-E, Table S5), implying the emergence of distinct developmental trajectories  
223 during reprogramming. Indeed, assessment of gene expression levels along pseudotime confirmed that  
224 neurogenic genes (*NRCAM*, *SFRP1*, *SNAP25* and *SYT1*) and genes regulating the development of  
225 mesodermal tissues including bone (*BMP4*), kidney (*FAT4*) and endothelial cells (*PGF* and *VEGFA*)  
226 were consistently up-regulated and followed a similar expression trajectory pattern during the  
227 reprogramming process (Figure S5F-H).

228 To identify exogenous transcription factors governing the emergence of distinct developmental  
229 trajectories, we reordered the cells using a set of 3,322 genes previously implicated in various  
230 developmental processes (Figure 5A; Table S6). This revealed bifurcation of cells into two main  
231 trajectories, separating the majority of Ci and part of early TFi (branch 1) from the rest of TFi (branch  
232 2). Branch-specific GO analysis (fold-change  $> 4$ ;  $p < 0.05$ ) suggested association of branch 2 with cell  
233 fate commitment towards the neuronal lineage, while branch 1 was associated with alternative  
234 developmental fates (Figures 5B-C; Table S7). Notably, no exogenous transcription factor was  
235 specifically enriched in branch 1 (Fisher's exact test;  $p > 0.05$ ) (Figures 5D and S5I). In contrast, branch  
236 2 showed significant enrichment of 10 exogenous transcription factors (*ASCL1*, *DLX1*, *DLX2*, *FEV*,  
237 *FOXP2*, *ISL1*, *NEUROG2*, *NR4A2*, *PAX6* and *ZIC1*;  $p < 10^{-2}$ ). We independently transduced fibroblasts  
238 with the complete TF-pool (20 transcription factors), the 10 transcription factors enriched in branch 1,  
239 and the 10 transcription factors showing no enrichment in either branch. Neuronal profiling using  
240 immunofluorescence for TUBB3 and MAP2 and qPCR for pan-neuronal, neurotransmitter and fibroblast



241 marker genes revealed that infection with transcription factors enriched in branch 2 markedly increased  
242 the efficiency of neuronal reprogramming compared to both the complete TF-pool and transcription  
243 factors that showed no branch-specific enrichment (Figures 5E-H). In fact, infection with transcription  
244 factors without branch-specific enrichment reduced the efficiency of neuronal conversion compared to  
245 the complete TF-pool and upregulated genes that were enriched in branch 1, such as *AREG* and  
246 *PTHR1*, during pseudo-temporal ordering (Figure 5I). Collectively, these data revealed that the cocktail  
247 of small molecules converted cells into „uncommitted“ cells, whereas combination of small molecules  
248 with ectopic expression of defined transcription factors enhanced the conversion towards the neuronal  
249 lineage.

250

### 251 **Identification of GRNs controlling subtype specification of induced neurons**

252 In previous reports, a single transcription factor was sufficient to reprogram cells to iN (Chanda et al.,  
253 2014; Liu et al., 2013). The reprogramming of the vast majority of neuronal subtypes, however, requires  
254 combinatorial expression of transcription factors in the same cell (Tsunemoto et al., 2018). To infer  
255 combinations of exogenous transcription factors governing neuronal subtype specification from our  
256 single-cell data, we classified each subtype based on canonical marker genes for glutamatergic,  
257 cholinergic, dopaminergic, GABAergic, serotonergic, glycinergic neurons, and neuronal progenitor cells  
258 (NPC). Next, exogenous transcription factors were assigned to each neuronal subtype network based  
259 on significant association with at least 3 endogenous marker genes (Fisher's exact tests;  $p < 0.05$ )  
260 (Figure 6A). For NPC and glycinergic subtypes, only a single exogenous transcription factor (*ISL1* and  
261 *PAX6*, respectively) showed 3 or more associations, while no exogenous transcription factor showed  
262 more than 2 associations with serotonergic genes (Figure S6A). Notably, however, we identified various  
263 combinatorial enrichments of exogenous transcription factors associated with three or more of  
264 glutamatergic-, cholinergic-, dopaminergic- and GABAergic-related genes. Previous studies have  
265 shown that combination of *DLX1*, *DLX2* and *CTIP2* with miR-9/9\*-124 converted human fibroblasts into  
266 an enriched population of neurons analogous to GABAergic striatal medium spiny neurons, whereas  
267 combination of *FOXA2*, *NR4A2* and *PITX3* with additional transcription factors generated dopaminergic  
268 neurons (Caiazzo et al., 2011; Liu et al., 2012; Pfisterer et al., 2011; Victor et al., 2014). Our results, in  
269 part, are consistent with these studies; two of the four transcription factors associating with the  
270 GABAergic GRN were *DLX1* and *DLX2*, and three of the five exogenous transcription factors

271 associating with the dopaminergic GRN were *FOXA2*, *NR4A2* and *PITX3* (Figure 6B). Moreover, *ISL1*,  
272 which was previously combined with other transcription factors to convert human fibroblasts into  
273 cholinergic motor neurons (Son et al., 2011), associated stronger to the cholinergic GRN than to other  
274 GRNs. However, the distribution of transcription factors among subtype-specific GRNs was not mutually  
275 exclusive. For example, the glutamatergic GRN comprised transcription factors of all other GRNs, but  
276 further included *ASCL1*, *FEV*, *NEUROG2*. Thus, our data support a hierarchical reprogramming model  
277 which predicts that replacement of only a few factors can alter the fate of generated cells (Wapinski et  
278 al., 2013), and suggests that few transcription factors can override other transcription factors when co-  
279 expressed in the same cell.

280 Subsequently, we independently tested all four predicted neuronal subtype combinations and  
281 evaluated expression of VGLUT1, CHAT, TH and GABA in reprogrammed neurons (Figures 6C and  
282 S6B). In all combinations analyzed, ectopic expression of predicted combinations significantly enriched  
283 for the intended target subset when compared to the complete TF-pool control ( $p < 0.01$ ).

284 To identify minimal and robust combinations of transcription factors in glutamatergic and  
285 cholinergic GRNs, we attributed all genes Combination Scores (CS; Supplementary Methods). The CS  
286 represents the significance of cumulative marker gene expression in cells containing at least 2 of the  
287 predicted exogenous transcription factors (Figures 6D-E). In a second line of validation, we chose the  
288 gene with the highest CS for each network (*GRIK2* for the glutamatergic network and *CHRNA1* for the  
289 cholinergic network) and infected fibroblasts with predicted combinations of exogenous transcription  
290 factors. We evaluated phenotypes of iN at 21 dpi using immunofluorescence for VGLUT1, CHAT, TH  
291 and GABA. Infection with *GRIK2*-associated (*DLX2*, *NEUROG2*, *PAX6*, *ZIC1*) and *CHRNA1*-associated  
292 (*DLX1*, *ISL1*, *NEUROG2*, *PAX6*) transcription factors significantly enriched for glutamatergic and  
293 cholinergic neurons, respectively, when compared to fibroblasts infected with the complete TF-pool and  
294 Ci. Notably, *PAX6*, which associated with all four neuronal subtype-specific GRNs (Figures 6A-B), also  
295 was included in each of the newly identified combinations, indicating that similar to its role during normal  
296 neuronal development (Stoykova et al., 2000; Yun et al., 2001), *PAX6* acts as a master regulator during  
297 neuronal reprogramming.

298 Finally, to validate the functionality of our induced glutamatergic and cholinergic neurons, we  
299 characterized the electrophysiological properties of iN infected with *DLX2*, *NEUROG2*, *PAX6*, *ZIC1*  
300 (Figure 6F) and *DLX1*, *ISL1*, *NEUROG2*, *PAX6* (Figure 6G). We observed that iN infected with both

301 combinations of transcription factors could generate repetitive action potentials upon current injection  
302 (Figure 6F-G). We confirmed that these action potentials were inhibited by withdrawal of extracellular  
303 Na<sup>+</sup>. Notably, we observed that glutamatergic and cholinergic iN fired action potentials exhibiting  
304 different wave forms and showed significant differences in resting membrane potential and action  
305 potential duration, suggesting that the infection of the two different combinations of transcription factors  
306 generated iN with distinct electrophysiological properties.  
307 Collectively, these results demonstrate that Convert-seq enabled efficient identification of GRNs and  
308 defined transcription factors directing the reprogramming of fibroblasts towards distinct, functional  
309 neuronal subtypes.

310

## 311 **Discussion**

312 We developed Convert-seq, a method based on a previously published nested-PCR-based single-cell  
313 screening system (Shin et al., 2012), which adapts retrospective identification of vector-based gene  
314 expression in single-cells for the scale of massively-parallel single-cell RNA sequencing. Convert-seq  
315 overcomes the laborious and time-consuming process of identifying specific combinations of  
316 transcription factors capable to reprogram the original transcriptional network (Vierbuchen and Wernig,  
317 2011). Particularly in less well-characterized cell types, it is a daunting task to test all possible  
318 combinations of candidate reprogramming factors in a one-by-one approach. The intricacy to  
319 disentangle the roles of exogenous and endogenous genes during reprogramming further complicates  
320 matters, which is why, despite considerable success in the reprogramming of various cell types, still  
321 little is known about gene regulatory networks (GRNs) controlling the reprogramming process (Gascon  
322 et al., 2017).

323 We have demonstrated that when combined with SMART-seq technology (Picelli et al., 2014;  
324 Ramskold et al., 2012), Convert-seq can reliably discriminate between endogenous and exogenous  
325 transcripts both at the bulk and single-cell level. Thus, this method allows to analyze transcriptional  
326 effects initiated by different combinations of candidate reprogramming factors in a single experiment.  
327 Since the number of single cells required to reach statistical significance grows exponentially as the  
328 number of candidate genes increases, Convert-seq is incapable of profiling all possible combinations.  
329 Therefore, we have limited our study to a subset of possible combinations by adjusting the multiplicity  
330 of infection (MOI) and culture conditions that favour the survival of neuronal cells (i.e. positive selection).

331 Implementing Convert-seq in higher throughput platforms such as droplet-based scRNA-seq will further  
332 strengthen the utility of this approach. We tested Convert-seq in a droplet based 3'-seq platform,  
333 however, detection of exogenous transcripts was inefficient, possibly due to the strong 3' bias of the  
334 protocol. Future work could provide droplet-based scRNA-seq platforms with more even coverage  
335 across transcripts or encode the identity of exogenous genes in sequence barcodes at the 3'-end of  
336 constructs (Adamson et al., 2016; Dixit et al., 2016; Jaitin et al., 2016).

337         Achieving efficient generation of specific cell types still constitutes a central challenge in the  
338 field of reprogramming. However, using Convert-seq, we identified distinct developmental trajectories  
339 emerging early during the reprogramming of human fibroblasts to induced neurons and identified a set  
340 of 10 exogenous transcription factors to repress alternative developmental programs. Moreover, by  
341 discriminating exogenous and endogenous genes in single-cells, Convert-seq identified distinct  
342 combinations of transcription factors controlling the reprogramming of fibroblasts into different neuronal  
343 subtypes exhibiting distinct electrophysiological properties.

344         In addition to providing alternative sources for cell-based therapies, cell reprogramming could  
345 help to decipher the molecular logic behind subtype specification during normal development. Strikingly,  
346 our data recapitulates some of the general principles of normal neuronal development. For example,  
347 *PAX6*, a paired box transcription factor that acts as master regulator of the mammalian nervous system  
348 development and is expressed in region-specific manner in neuronal progenitor cells (NPCs) and  
349 uniformly in neuroectodermal cells differentiated from embryonic stem cells (ESCs) and iPSCs  
350 (Chapouton et al., 1999; Stoykova et al., 2000; Yun et al., 2001; Zhang et al., 2010), associated with all  
351 neuronal subtypes. *PAX6*-expressing neuroectodermal cells can be readily patterned to region specific  
352 NPCs that give rise to various neuronal subtypes including cholinergic neurons (Li et al., 2005),  
353 dopaminergic neurons (Yan et al., 2005) and GABAergic neurons (Kallur et al., 2008). Thus, our findings  
354 indicate that *PAX6* acts as a master regulator during reprogramming of iNs that, when combined with  
355 additional transcription factors, can instruct the specification into diverse neuronal subtypes. In line with  
356 this, our results show that combination of *PAX6* with *NEUROG2*, *DLX2* and *ZIC1* generates mainly  
357 glutamatergic neurons, whereas substitution of *DLX2* and *ZIC1* with *DLX1* and *ISL1* generates mainly  
358 cholinergic neurons. These findings are partly consistent with previous studies; in the dorsal  
359 telencephalon, *PAX6* and *NEUROG2* are involved in the specification of glutamatergic projection  
360 neurons, and overexpression of *Neurog2* in mouse embryonic stem cells and cultured mouse cortical

361 astroglia instructs the reprogramming of functional glutamatergic neurons (Berninger et al., 2007;  
362 Heinrich et al., 2010; Schuurmans and Guillemot, 2002; Thoma et al., 2012). Conversely, combination  
363 of *NEUROG2* expression with specific small molecules converts human fibroblasts to cholinergic  
364 neurons (Liu et al., 2013; Smith et al., 2016). Additional studies will be required to determine if *PAX6*,  
365 analogous to the master regulator *ASCL1*, acts as pioneer factor that can access its targets even if they  
366 are bound by nucleosomes (Wapinski et al., 2013).

367 In conclusion, the data obtained by Convert-seq corroborates previous studies on neuronal  
368 reprogramming and predicts novel combinations of pro-neuronal transcription factors that allow the  
369 generation of clinically relevant neuronal subtypes. Thus, Convert-seq represents an effective method  
370 to identify transcriptional codes controlling multiple cell fate conversions, speaking to its potential to  
371 become a standard strategy to unravel molecular mechanisms governing cell reprogramming.

372

## 373 **Acknowledgments**

374 This work was supported by a Research Grant from the Japanese Ministry of Education, Culture,  
375 Sports, Science and Technology (MEXT) and a Postdoctoral Fellowship for Research in Japan by the  
376 Japan Society for the Promotion of Science (JSPS). The authors wish to acknowledge RIKEN GenAS  
377 for the sequencing of the libraries.

378

## 379 **Author Contributions**

380 Formulation of research goals and aims: JL, JWS

381 Data curation: JL, TK, CP

382 Formal analysis: JL, TK, RN, JWS

383 Funding acquisition: JL, PC, JWS

384 Performing experiments: JL, TK, RN, TC, DS, MK, FR

385 Project supervision: PC, JWS

386 Writing – original draft, review & editing: JL, JWS

387

## 388 **Declaration of Interests**

389 All authors do not claim conflict of interest for this study.

## 390 **Figure legends**

391

### 392 **Figure 1. Generation of a heterogenous population of human induced neurons**

393 (A) Overview of Convert-seq.

394 (B) Immunostaining for canonical neuronal marker genes of fibroblasts at day 0 and Ci and TFi at 9 dpi  
395 and 21 dpi. Scale bars, 100 $\mu$ m. YFP (green) marks infected cells and cell nuclei were visualized using  
396 DAPI nuclear stain (grey).

397 (C) Quantification of immunostainings in B.  $n = 4$  independent experiments, error bars represent mean  
398 + SD.

399 (D) qPCR for pan-neuronal marker genes (*MAP2*, *NRCAM*, *NEUN*, *SYN1*; top), canonical neuronal  
400 subtype markers (*SLC17A7*, *GABRA1*, *TH*, *CHAT*; middle) and canonical fibroblast markers (*VIM*,  
401 *SNAI1*; bottom).  $n = 3$  independent experiments, error bars represent mean + SD.

402 (E) Immunostainings for canonical neuronal subtype markers (red) of TFi at 21 dpi. Scale bars, 100 $\mu$ m.  
403 YFP (green) marks infected cells and cell nuclei were visualized using DAPI nuclear stain (grey).

404 (F) Quantification of immunostainings in E. Error bars represent mean + SD.

405

### 406 **Figure 2. Molecular characterization of induced neurons using scRNA-seq**

407 (A) Visualization of droplet-based scRNA-seq data from Ci and TFi at 14 dpi using t-SNE ( $n = 3865$   
408 cells). The detected clusters are indicated by different colors.

409 (B) Heat map of the relative expression of canonical fibroblast and neuron markers along t-SNE 2.

410 (C) Heat map of the relative expression of top marker genes for each cluster in the t-SNE plot in (A).

411 (D) GO analysis of cluster-specific marker genes in clusters CL4 – CL9. Shown are top 5 GO terms  
412 related to biological process (dark grey) and cellular component (light grey) for each cluster; colors as  
413 in (A).

414 (E) Violin plots of log<sub>2</sub>-transformed CPM values of marker genes in all clusters.

415 (F) Annotation of TFi clusters CL4 – CL9 based on genes differentially expressed between each cluster.

416

### 417 **Figure 3. Convert-seq Detection of Exogenous and Endogenous Transcripts**

418 (A) Schematic depicting the strategy to distinguish exogenous and endogenous sequencing reads.

419 (B) Bulk Convert-seq on pooled and separately infected fibroblasts. Horizontal dimension; distance from  
420 the 5' end of the EF1A promoter, vertical dimension; number of aligned paired-end reads. Gray arrows  
421 (no overlap) and golden arrows (overlap) mark 5' and 3' junctions of exogenous ORFs.

422 (C-D) Heat maps showing  $\log_2$ -transformed count values of exogenous transcription factors after  
423 alignment using Bowtie (C) and  $\log_2$ -transformed TPM values of exogenous and endogenous  
424 transcription factor pairs after trimming junction sequences to ~100 base pairs and alignment using  
425 Kallisto (D). For individually infected fibroblasts and Ci, 2 replicates at an MOI of 4 and 2 replicates at  
426 an MOI of 8 were included. For pooled infected fibroblasts, 2 replicates at an MOI of 4 were included.

427 (E) Box plots showing increased exogenous (red) versus endogenous (blue) expression of all  
428 transcription factors across all individually infected fibroblasts. Golden dots show endogenous  
429 expression in samples infected with the corresponding exogenous transcription factors. Error bars  
430 represent mean + SD.

431

#### 432 **Figure 4. Induced neurons resemble primary human newborn neurons in global gene expression**

433 (A) Diagram of the differentiation protocol of TFi and Ci, depicting the samples used for the time-course  
434 scRNAseq experiment.

435 (B) t-SNE 2D cell maps of the time-course data. Left: cells were colored by cluster identity. Right: cells  
436 were colored by sample identity. Fibroblasts ( $n = 78$  cells), Ci at 9 dpi ( $n = 87$  cells), TFi at 9 dpi ( $n =$   
437  $129$ ), Ci at 21 dpi ( $n = 15$  cells), TFi at 21 dpi ( $n = 137$  cells).

438 (C) Heat map of the relative expression of top marker genes for each cluster in the t-SNE plot in (B).

439 (D) Lineage relationships of fibroblasts, Ci, TFi and primary cortical and medial ganglionic eminence  
440 cells ( $n = 4261$  cells) in an adjacency network.

441 (E) Visualization of relative expression values of exogenous transcription factors on t-SNE plots.

442

#### 443 **Figure 5. Association of developmental trajectories with exogenous expression profiles.**

444 (A) Pseudo-temporal ordering of cells (Fluidigm C1) based on the expression of 3,322 developmental  
445 genes ( $n = 446$  cells). Small inset shows the same plot colored by pseudo-temporal values.

446 (B) Branch-specific relative expression of neurogenic genes (top row), cell cycle-related genes (middle  
447 row) and genes related to alternative developmental fates (down row) along pseudo-time.



448 (C) GO analysis of genes differentially expressed in branch 1 (top panel) and branch 2 (bottom panel).  
449 (D) Identification of exogenous transcription factors with branch-specific enrichment based on Fisher's  
450 exact tests.  
451 (E) Top panels: Quantification of TUBB3<sup>+</sup> and MAP2<sup>+</sup> cells in fibroblasts infected with the complete  
452 TF-pool (gray), branch 2-enriched transcription factors (orange) and unenriched transcription factors  
453 (purple) at 9 dpi and 21 dpi.  $n = 5$  independent experiments, error bars represent mean + SD. Bottom  
454 panels: Representative images of immunostainings for MAP2 (red) at 21 dpi; colors as in top panels.  
455 YFP (green) marks infected cells and cell nuclei were visualized using DAPI nuclear stain (grey). Scale  
456 bars, 100  $\mu\text{m}$ .  
457 (F-I) Neuronal differentiation, loss of fibroblast characteristics and acquisition of alternative  
458 developmental fates as revealed by qPCR for pan-neuronal marker genes (*MAP2*, *NRCAM*, *NEUN*,  
459 *SYN1*; F), canonical neuronal subtype markers (*VGLUT1*, *GABA*, *TH*, *CHAT*; G), canonical fibroblast  
460 markers (*VIM*, *SNAI2*; H) and branch 1-enriched genes (*AREG*, *PTHR1*; I at 9 dpi and 21 dpi; colors as  
461 in E.  $n = 4$  independent experiments, error bars represent mean + SD.

462

463 **Figure 6. Identification of GRNs controlling subtype specification of induced neurons.**

464 (A) Neuronal subtype-specific gene regulatory networks on the basis of significant associations  
465 (Fisher's exact test,  $p < 0.05$ ). Neuronal subtype-specific genes are colored. Exogenous transcription  
466 factors with at least 3 edges to neuronal subtype-specific genes are shown in black. Exogenous  
467 transcription factors with less than 3 edges are shown in gray.  
468 (B) Edge-normalized network summarizing the associations of exogenous transcription factors (shown  
469 in A) with neuronal subtype-specific GRNs.  
470 (C) Validation of GRNs as revealed by quantifications of immunostainings for VGLUT1, CHAT, TH and  
471 GABA of fibroblasts separately infected with the TF-pool (gray) or with exogenous transcription factors  
472 shown in the boxes at 21 dpi (colored).  $n = 5$  independent experiments, error bars represent mean +  
473 SD.  
474 (D-E) Left panels: visualization of Combinations Scores (CS) of glutamatergic-specific (D) and  
475 cholinergic-specific (E) GRNs. Exogenous transcription factors associated with genes showing highest  
476 CS in each gene regulatory network are shown in black, all other exogenous transcription factors are  
477 shown in gray. Neuronal subtype-specific genes are colored. Right panels: Validation of novel

478 combinations of exogenous transcription factors by quantification of immunostainings for VGLUT1,  
479 CHAT, TH and GABA of Ci (light gray), fibroblasts infected with the complete TF-pool (dark gray) and  
480 fibroblasts infected with novel combinations (color) at 21 dpi.  $n = 4$  independent experiments, error bars  
481 represent mean + SD.

482 (F-G) The generation of the action potential in iN infected with *DLX2*, *NEUROG2*, *PAX6*, *ZIC1* (F) or  
483 *DLX1*, *ISL1*, *NEUROG2*, *PAX6* (G). Representative traces in the presence (upper panel) or absence  
484 (lower panel) of extracellular  $\text{Na}^+$  were recorded using the current-clamp protocol.

485

486

487

488

489

490

491

492

493

494

495

496

497

498

499

500

## STAR Methods

### Key Resources Table

| REAGENT or RESOURCE                                                 | SOURCE                   | IDENTIFIER                        |
|---------------------------------------------------------------------|--------------------------|-----------------------------------|
| <b>Antibodies</b>                                                   |                          |                                   |
| Mouse monoclonal anti-Tubulin, beta, Class III (Tuj1)               | Covance                  | Cat# MMS-435P;<br>RRID:AB_2313773 |
| Mouse monoclonal anti-Map2                                          | Abcam                    | Cat# ab11267;<br>RRID:AB_297885   |
| Rabbit polyclonal anti-Synapsin1                                    | Abcam                    | Cat# ab64581;<br>RRID:AB_1281135  |
| Rabbit polyclonal anti-vGlut1                                       | Synaptic Systems         | Cat# 135 303<br>RRID:AB_887875    |
| Mouse monoclonal anti-GABA                                          | Abcam                    | Cat# ab86186<br>RRID:AB_1925012   |
| Rabbit polyclonal anti-TH                                           | Abcam                    | Cat# ab112<br>RRID:AB_297840      |
| Sheet polyclonal anti-CHAT                                          | Abcam                    | Cat# ab18736<br>RRID:AB_2244867   |
| Goat anti-mouse IgG1                                                | Molecular Probes         | Cat# A-21123<br>RRID:AB_141592    |
| Goat anti-mouse IgG2a                                               | Thermo Fisher Scientific | Cat# A-21133<br>RRID:AB_2535772   |
| Goat polyclonal anti-rabbit IgG (H+L)                               | Thermo Fisher Scientific | Cat# R37117<br>RRID:AB_2556545    |
| Donkey polyclonal anti-sheep IgG (H+L)                              | Thermo Fisher Scientific | Cat# A-21098<br>RRID:AB_2535752   |
| <b>Chemicals, Peptides and Recombinant Proteins</b>                 |                          |                                   |
| Fetal Bovine Serum (FBS)                                            | Clontech                 | Cat# 631367                       |
| Penicilin&Streptomycin                                              | Thermo Fisher Scientific | Cat# 15140122                     |
| Trypsin-EDTA                                                        | Sigma-Aldrich            | Cat# 25200-114                    |
| Polybrene                                                           | Sigma-Aldrich            | Cat# H9268                        |
| Poly-D-Lysine                                                       | Sigma-Aldrich            | Cat# P6407                        |
| Laminin from Engelbreth-Holm-Swarm murine sarcoma basement membrane | Sigma-Aldrich            | Cat# L2020                        |

|                                                                                 |                          |                 |
|---------------------------------------------------------------------------------|--------------------------|-----------------|
| B27 Supplement (50x), serum free                                                | Thermo Fisher Scientific | Cat# 17504044   |
| N2 Supplement (100x)                                                            | Thermo Fisher Scientific | Cat# 17502048   |
| MEM Non-Essential Amino Acids Solution (100x)                                   | Thermo Fisher Scientific | Cat# 11140050   |
| Glutamax Supplement                                                             | Thermo Fisher Scientific | Cat# 35050061   |
| Valproic Acid for Biochemistry                                                  | WAKO                     | Cat# 227-01071  |
| L-Ascorbic Acid                                                                 | Sigma-Aldrich            | Cat# A92902     |
| ROCK inhibitor Y-27632                                                          | WAKO                     | Cat# 253-00513  |
| N <sup>6</sup> ,2'-O-Dibutyryl adenosine 3',5'-cyclic monophosphate sodium salt | Sigma-Aldrich            | Cat# D0260      |
| CHIR99021                                                                       | Abcam                    | Cat# ab120890   |
| SB-431542                                                                       | Sigma-Aldrich            | Cat# S4317      |
| LDN-193189                                                                      | REPROCELL                | Cat# 04-0074-10 |
| Human Noggin                                                                    | Sigma-Aldrich            | Cat# SRP4675    |
| BDNF Recombinant human protein                                                  | Thermo Fisher Scientific | Cat# 10908010   |
| NT3 Recombinant human protein                                                   | R&D Systems              | Cat# 267-N3     |
| GDNF Recombinant human protein                                                  | Thermo Fisher Scientific | Cat# PHC7044    |
| Proteinase K Solution                                                           | Thermo Fisher Scientific | Cat# AM2548     |
| FuGENE HD Transfection Reagent                                                  | Promega                  | Cat# E2311      |
| HBSS, calcium, magnesium, no phenol red                                         | Thermo Fisher Scientific | Cat# 14025092   |
| RNase ONE Ribonuclease                                                          | Promega                  | Cat# M4261      |
| Triton X-100                                                                    | Sigma-Aldrich            | Cat# T8787      |
| <b>Critical Commercial Assays</b>                                               |                          |                 |
| Gateway LR Clonase II Enzyme mix                                                | Thermo Fisher Scientific | Cat# 11791100   |
| PureYield Plasmid Midiprep System                                               | Promega                  | Cat# A2492      |

|                                          |                          |                  |
|------------------------------------------|--------------------------|------------------|
| RNeasy Mini Kit                          | Quiagen                  | Cat# 74106       |
| One-Step SYBR PrimeScript RT PCR Kit II  | Takara                   | Cat# RR086A      |
| Chromium™ Single Cell 3' Reagent kits V1 | 10x Genomics             | Cat# CG00026     |
| KAPA Library Quantification kit          | KAPA BIOSYSTEMS          | Cat# 07960166001 |
| ERCC RNA Spike-In Mix1                   | Thermo Fisher Scientific | Cat# 4456740     |
| SMARTer Ultra Low RNA Kit                | Clontech                 | Cat# 634848      |
| Quant-iT™ PicoGreen dsDNA Assay kit      | Thermo Fisher Scientific | Cat# P7589       |
| Nextera XT DNA Library Preparation kit   | Illumina                 | Cat# FC-131-1024 |
| Nextera XT Index Kit v2                  | Illumina                 | Cat# FC-131-1002 |
| <b>Deposited Data</b>                    |                          |                  |
| Raw and analyzed data                    | This Paper               | GEO: GSE117075   |
| <b>Experimental Models: Cell Lines</b>   |                          |                  |
| Human neonatal dermal fibroblasts        | Lonza                    | Cat# C-2509      |
| HEK293T                                  | ATCC                     | Cat# CRL-3216    |
| <b>Recombinant DNA</b>                   |                          |                  |
| CSII-EF-RfA-IRES2-VENUS-ASCL1            | This paper               | N/A              |
| CSII-EF-RfA-IRES2-VENUS-DLX1             | This paper               | N/A              |
| CSII-EF-RfA-IRES2-VENUS-DLX2             | This paper               | N/A              |
| CSII-EF-RfA-IRES2-VENUS-FEV              | This paper               | N/A              |
| CSII-EF-RfA-IRES2-VENUS-FOXA2            | This paper               | N/A              |
| CSII-EF-RfA-IRES2-VENUS-FOXP2            | This paper               | N/A              |
| CSII-EF-RfA-IRES2-VENUS-ISL1             | This paper               | N/A              |
| CSII-EF-RfA-IRES2-VENUS-LHX2             | This paper               | N/A              |

|                                     |                         |                                                                                                                                             |
|-------------------------------------|-------------------------|---------------------------------------------------------------------------------------------------------------------------------------------|
| CSII-EF-RfA-IRES2-<br>VENUS-NEUROD1 | This paper              | N/A                                                                                                                                         |
| CSII-EF-RfA-IRES2-<br>VENUS-NEUROG2 | This paper              | N/A                                                                                                                                         |
| CSII-EF-RfA-IRES2-<br>VENUS-NR2F1   | This paper              | N/A                                                                                                                                         |
| CSII-EF-RfA-IRES2-<br>VENUS-NR2F2   | This paper              | N/A                                                                                                                                         |
| CSII-EF-RfA-IRES2-<br>VENUS-NR4A2   | This paper              | N/A                                                                                                                                         |
| CSII-EF-RfA-IRES2-<br>VENUS-OLIG2   | This paper              | N/A                                                                                                                                         |
| CSII-EF-RfA-IRES2-<br>VENUS-OTX2    | This paper              | N/A                                                                                                                                         |
| CSII-EF-RfA-IRES2-<br>VENUS-PAX6    | This paper              | N/A                                                                                                                                         |
| CSII-EF-RfA-IRES2-<br>VENUS-PITX3   | This paper              | N/A                                                                                                                                         |
| CSII-EF-RfA-IRES2-<br>VENUS-POU3F2  | This paper              | N/A                                                                                                                                         |
| CSII-EF-RfA-IRES2-<br>VENUS-TLX3    | This paper              | N/A                                                                                                                                         |
| CSII-EF-RfA-IRES2-<br>VENUS-ZIC1    | This paper              | N/A                                                                                                                                         |
| <b>Software and Algorithms</b>      |                         |                                                                                                                                             |
| Bowtie v1.2.2                       | (Langmead et al., 2009) | <a href="http://bowtie-bio.sourceforge.net/index.shtml">http://bowtie-bio.sourceforge.net/index.shtml</a>                                   |
| Kallisto v0.42.4                    | (Bray et al., 2016)     | <a href="https://pachterlab.github.io/kallisto/">https://pachterlab.github.io/kallisto/</a>                                                 |
| R v3.5.2                            | R project               | <a href="https://www.r-project.org/">https://www.r-project.org/</a>                                                                         |
| edgeR v3.24.3                       | (Robinson et al., 2010) | <a href="https://bioconductor.org/packages/release/bioc/html/edgeR.html">https://bioconductor.org/packages/release/bioc/html/edgeR.html</a> |
| rio v0.5.16                         | CRAN                    | <a href="https://cran.r-project.org/web/packages/rio/index.html">https://cran.r-project.org/web/packages/rio/index.html</a>                 |
| Tidyverse v1.2.1                    | CRAN                    | <a href="https://cran.r-project.org/web/packages/tidyverse/index.html">https://cran.r-project.org/web/packages/tidyverse/index.html</a>     |
| Readxl v1.2.0                       | CRAN                    | <a href="https://cran.r-project.org/web/packages/readxl/index.html">https://cran.r-project.org/web/packages/readxl/index.html</a>           |
| Reshape v0.8.8                      | (Wickham, 2007)         | <a href="https://cran.r-project.org/web/packages/reshape/index.html">https://cran.r-project.org/web/packages/reshape/index.html</a>         |
| pheatmap v1.0.12                    | CRAN                    | <a href="https://cran.r-project.org/web/packages/pheatmap/index.html">https://cran.r-project.org/web/packages/pheatmap/index.html</a>       |

|                    |                         |                                                                                                                                                 |
|--------------------|-------------------------|-------------------------------------------------------------------------------------------------------------------------------------------------|
| data.table v1.12.0 | CRAN                    | <a href="https://cran.r-project.org/web/packages/data.table/index.html">https://cran.r-project.org/web/packages/data.table/index.html</a>       |
| Seurat v2.3.0      | (Butler et al., 2018)   | <a href="https://cran.r-project.org/web/packages/Seurat/index.html">https://cran.r-project.org/web/packages/Seurat/index.html</a>               |
| Dendextend v1.9.0  | (Galili, 2015)          | <a href="https://cran.r-project.org/web/packages/dendextend/citation.html">https://cran.r-project.org/web/packages/dendextend/citation.html</a> |
| monocle v2.2.0     | (Trapnell et al., 2014) | <a href="https://bioconductor.org/packages/release/bioc/html/monocle.html">https://bioconductor.org/packages/release/bioc/html/monocle.html</a> |
| Cytoscape v3.7.1   | (Shannon et al., 2003)  | <a href="https://cytoscape.org/">https://cytoscape.org/</a>                                                                                     |

501

## 502 Cell culture and generation of iN

503 Human neonatal dermal fibroblasts were purchased from Lonza (C-2509; passages 4-8) and cultured  
504 in DMEM containing 10% FBS/L-glutamine/10% Penicilin&Streptomycin at 37°C 5% CO<sub>2</sub> until virus  
505 infection. For TFi generation, a total of 6 MOI (~0.3 MOI per virus) were pooled into culture medium  
506 containing 8 µg\*ml<sup>-1</sup> Polybrene (SIGMA) to increase infection efficiency. The virus pool was infected  
507 and incubated overnight at 37°C 5% CO<sub>2</sub>. On the following day, virus-containing medium was removed  
508 and cells were incubated for an additional day in fresh culture medium at 37°C 5% CO<sub>2</sub>. For iN  
509 generation, infected cells were split onto Poly-d-lysine (100µg\*ml<sup>-1</sup>; SIGMA) / Laminin (50µg\*ml<sup>-1</sup>;  
510 SIGMA)-coated culture plates and incubated overnight in culture medium at 37°C 5% CO<sub>2</sub>. On the  
511 following day, medium was changed to neuronal induction medium containing DMEM/F12 and  
512 Neurobasal-A (Thermo Fisher Scientific) mixed at a 1:1 ratio, 2% (vol/vol) B27 supplement and 0.5%  
513 N2 Supplement (GIBCO), 1x nonessential amino acids (Thermo Fisher Scientific), 1% GlutaMAX  
514 supplement, VPA (0.5mM, WAKO), L-Ascorbic acid (200nM, SIGMA), Y-27632 (10µM, WAKO), dcAMP  
515 (0.5mM, SIGMA), 10% FBS and 10% Penicilin&Streptomycin (WAKO). The concentrations of small  
516 molecules used were as follows: CHIR99021 (2µM, Abcam), SB-431542 (10µM, SIGMA), LDN-193189  
517 (0.5µM, Stemgent), Noggin (100ng\*ml<sup>-1</sup>, SIGMA). Neuronal induction medium was changed every third  
518 day, during which the concentration of FBS was gradually reduced from 10% to 0%. After 2 weeks,  
519 neuronal induction medium was replaced with neuronal maturation medium without small molecules,  
520 but containing 10ng\*ml<sup>-1</sup> BDNF (GIBCO), 10ng\*ml<sup>-1</sup> NT3 (R&D Systems) and 10ng\*ml<sup>-1</sup> GDNF (Thermo  
521 Fisher Scientific) and the medium was changed every third day until further analysis.

522

## 523 Complementary DNA and virus generation



524 Complementary DNA (cDNA) and viruses were generated as described previously (Shin et al., 2012).  
525 Briefly, we recombined Gateway-compatible human full-length cDNA entry clones derived from RIKEN  
526 BRC clone bank (<http://www.brc.riken.jp/>) into the pENTR lentivirus vector CSII-EF-RfA-IRES2-VENUS  
527 using Gateway LR clonase II enzyme mix (Invitrogen). After Proteinase K treatment, recombined  
528 plasmids were transformed into competent *Escherichia coli* and plasmids derived from single colonies  
529 were expanded and purified using PureYield Plasmid Midiprep System (Promega). Plasmids, HIV-gp  
530 and VSV envelope genes were co-transfected onto 293T cells using FuGeneHD (Roche). Supernatant-  
531 containing viruses were collected, centrifuged by ultracentrifugation and dissolved in 100µl HBSS buffer  
532 (WAKO) and stored at -80°C for later use.

533

#### 534 Immunocytochemistry and quantitative RT-PCR

535 For immunocytochemistry, cells were fixed in 4% paraformaldehyde for 20 min at room temperature  
536 and permeabilized using 0.2% Triton X-100 (SIGMA) for 10 min at room temperature. Following  
537 permeabilization, cells were pre-incubated with blocking solution (2% BSA, 0.2% Triton X-100) to block  
538 non-specific sites for 1 h. Primary antibodies were diluted in blocking solution and applied to cells over  
539 night at 4°C. Secondary antibodies were diluted in blocking solution and applied to cells at room  
540 temperature for 1 h. Imaging was performed using the INCell Analyzer 6000 (GE Healthcare). The  
541 following primary antibodies and dilutions were used: mouse anti-TUBB3 (Covance, 1:1000), mouse  
542 anti-MAP2 (Abcam, 1:500), rabbit anti-SYNAPSIN 1 (Abcam, 1:200), rabbit anti-VGLUT1 (Synaptic  
543 Systems, 1:100), mouse anti-GABA (Abcam, 1:200), sheep anti-CHAT (Abcam, 1:100), rabbit anti-TH  
544 (Abcam, 1:500). The following secondary antibodies and dilutions were used: goat anti-mouse IgG1  
545 (GIBCO, 1:200), goat anti-mouse IgG2a (Thermo Fisher Scientific, 1:200), goat anti-rabbit IgG (Thermo  
546 Fisher Scientific, 1:200), donkey anti-sheep IgG (Thermo Fisher Scientific, 1:200). Human neonatal  
547 dermal fibroblasts were used as negative controls. Quantification of immunostainings was performed  
548 using the INCell Investigator Developer Toolbox. For quantitative RT-PCR (qRT-PCR), total RNA was  
549 purified using the RNeasy Mini Kit (QIAGEN) according to the manufacturer's specification. Quality and  
550 quantity of RNA was determined using a DropSense96 (Trinean). Equal amounts of RNA were reverse-  
551 transcribed using the One-Step SYBR PrimeScript RT PCR Kit II, and cDNAs were normalized to equal

552 amounts using primers against *Gapdh*. qRT-PCR was performed on a 7900HT Fast Real-Time PCR  
553 system (Applied Biosystems).

554

#### 555 Convert-seq

556 *Artificial transcript model*: To determine the exact nucleotide sequences flanking the ORF of each  
557 exogenous transcript, we sequenced recombinant plasmids using a 3730/3730xl DNA Analyzer (Applied  
558 Biosystems) following the manufacturer's protocol. Briefly, we first amplified templates by PCR using a  
559 primers annealing to the EF1A promoter sequence near the 5' end of each ORF to amplify the 5' junction  
560 sequences and primers annealing to the IRES2 sequence near the 3' end of each ORF to amplify the  
561 3' junction sequences. After gel purification, we sequenced templates using BigDye Terminator v3.1  
562 Cycle Sequencing Kits (Applied Biosystems). We integrated results derived from 3 primers (3 replicates  
563 each) at both the 5' and 3' junction of each ORF and combined the resulting 5' and 3' junction sequences  
564 with known sequences of the ORFs of each transcription factor and the CSII-EF-RfA-IRES2-VENUS  
565 pENTR lentivirus vector to compile the artificial exogenous transcript model. Lastly, we combined our  
566 artificial exogenous transcript model with the human transcriptome (version GRCh38.p5) to obtain the  
567 final artificial transcript model.

568 *Read alignment with Bowtie*: Reads were aligned to the artificial transcript model using Bowtie v1.2.2  
569 with the default parameter settings for paired-end reads. After retrieving BED12 files using samtools  
570 and bedtools, we intersected all reads using a custom GFF file in which 5' and 3' junctions of all  
571 exogenous sequences were defined. Only reads overlapping the junction sequences by at least 5 bp  
572 were counted as specific reads. The expression values of all exogenous transcription factors were  
573 quantified as count per million (CPM) and transformed to  $\log_2(\text{CPM}+1)$ .

574 *Read alignment with Kallisto*: For alignment using Kallisto (v0.42.4), alignment to the full artificial  
575 transcript model yielded many false-positive hits (Figure S3B). Therefore, we trimmed the 5' and  
576 3' junction sequences to ~100 bp on either side, which markedly reduced the number of false positive  
577 hits (Figure 3D). Reads were aligned with the default parameter settings for paired-end reads. Custom  
578 R scripts were used to merge transcript isoforms and compile a single expression matrix.

579 *Convert-seq on Drop-seq data*: Since the CellRanger Software does not provide a single FASTQ file  
580 for each single-cell, we used the bcl2fastq Conversion Software to convert and demultiplex BCL files.

581 After retrieving FASTQ files for each single cell, reads were aligned to the trimmed artificial transcript  
582 model using Kallisto with the default parameter settings in paired-end mode.

583

#### 584 Droplet-based scRNA-seq

585 *Library preparation and sequencing:* Droplet-based scRNA-seq libraries were generated using the  
586 Chromium™ Single Cell 3' Reagent kits V1 (CG00026, 10x Genomics). Briefly, cell number and cell  
587 viability were assessed using the Countess II Automated Cell Counter (ThermoFisher). Thereafter, cells  
588 were mixed with the Single Cell Master Mix and loaded together with Single Cell 3' Gel beads and  
589 Partitioning Oil into a Single Cell 3' Chip. RNA transcripts were uniquely barcoded and reverse-  
590 transcribed in droplets. cDNAs were pooled and amplified according to the manufacturer's protocol.  
591 Libraries were quantified by High Sensitivity DNA Reagents (Agilent Technologies) and the KAPA  
592 Library Quantification kit (KAPA BIOSYSTEMS). Libraries then were sequenced by Illumina Hiseq 2500  
593 in rapid mode.

594 *Read alignment and gene quantification:* Initial read alignment to hg19 human reference genome,  
595 filtering and UMI counting was performed by the CellRanger Software ver 1.1.0 using default  
596 parameters. This software implements STAR as an alignment tool. Data from TFi and Ci were  
597 normalized to the same sequencing depth and aggregated into a single gene-barcode matrix. The  
598 expression values were quantified as count per million (CPM) and transformed to  $\log_2(\text{CPM}+1)$ .

599

#### 600 scRNAseq using the Fluidigm C1 platform

601 *Library preparation and sequencing:* Single cell RNA-seq analysis was performed following the  
602 manufacturer's protocol (P100-7168L1, Fluidigm). Briefly, cell number and cell viability were assessed  
603 using the Countess II Automated Cell Counter (ThermoFisher). After priming medium size C1 Single-  
604 cell Open App IFCs, 250 cells/ $\mu\text{L}$  were loaded and capture efficiency and cell morphology was assessed  
605 using the IN Cell Analyzer 6000 (GE Healthcare). To exclude chambers loaded with no cells, more than  
606 one cell (cell doublets) or dead cells for downstream analysis, we took 11 z-stacking images per  
607 chamber. Next, cells were lysed with 20,000-fold diluted ERCC RNA Spike-In Mix1 (Thermo Fisher  
608 Scientific) and reverse transcription (RT) and cDNA amplification were performed using the SMARTer  
609 Ultra Low RNA Kit for the Fluidigm C1™ System (Clontech). The amplified cDNAs were harvested into  
610 96 well plates and quantified with Quant-iT™ PicoGreen dsDNA Assay kit. Library preparation was

611 performed with the Nextera XT DNA Library Preparation kit (Illumina), Nextera XT Index Kit v2 (Illumina)  
612 and AMPure XP beads (Beckman Coulter). Libraries were quantified by High Sensitivity DNA Reagents  
613 (Agilent Technologies) and KAPA Library Quantification kit (KAPA BIOSYSTEMS). Each of the libraries  
614 were sequenced by Illumina Hiseq 2500 in highoutput mode (100bp paired end).

615 *Read alignment and gene quantification:* Reads were aligned to the trimmed artificial transcript model  
616 using Kallisto with the default parameter settings for paired-end reads. The expression values were  
617 quantified as transcript per million (TPM) and transformed to  $\log_2(\text{TPM}+1)$ .

618

### 619 Fluidigm C1 reversed loading protocol (backloading) for bulk RNAseq

620 To perform bulk RNAseq of a total of 96 samples, we used the Fluidigm Script Builder™ to design a  
621 reversed protocol that allows to load each sample into a separate chamber, where RT and cDNA  
622 amplification is performed. After priming the chips, 25 ng of RNA of each sample was loaded into the  
623 output wells on a medium size C1 Single-cell Open App IFC and the IFC was sealed using a C1 Porous  
624 Barrier Tape kit (Fluidigm). RT and cDNA amplification was performed following the manufacturer's  
625 protocol (P100-7168L1). We ran the backloading script for 15 min at 4°C and switched to the mRNA  
626 seq RT and Amp script (1772x), which harvested cDNA back into the output wells. To remove remaining  
627 RNA, we added Rnase One Ribonuclease (Promega) at room temperature. To quantify the cDNA, we  
628 used the Quant-iT PicoGreen dsDNA Assay kit. Library preparation was performed using the Nextera  
629 XT DNA Library Preparation kit (Illumina), the Nextera XT Index Kit v2 (Illumina) and Ampure XP beads  
630 (Beckman Coulter). Libraries were quantified using the High Sensitivity DNA Reagents (Agilent  
631 Technologies) and the KAPA Library Quantification kit (KAPA BIOSYSTEMS). Libraries were  
632 sequenced on the Illumina Hiseq 2500 platform in rapid mode (100bp paired end).

633

### 634 Electrophysiology

635 Conventional whole-cell current-clamp recordings were performed as described previously (Ichikawa  
636 et al., 2012). All experiments were conducted at 25°C. Patch pipettes with resistances ranging from  
637 3–7 M $\Omega$  were pulled from capillary tubes using a DMZ-Universal puller (Zeitz Instruments GmbH,  
638 Martinsried, Germany) and then back-filled with intracellular solution. Action potentials were recorded  
639 by a patch clamp amplifier (axopatch 200B; Axon Instruments, Foster City, CA) with a series of  
640 current step from 0 to 200 pA with a 2,000-ms duration. The action potentials were monitored and

641 stored using pCLAMP software (Molecular Devices, LLC., CA) after digitizing the analog signals at 5  
642 kHz (DigiData 1322A; Axon Instruments, Foster City, CA). For patch-clamp recordings, the  
643 extracellular solution (ECS) consisted of the following: 137 mM NaCl, 5 mM KCl, 0.44 mM KH<sub>2</sub>PO<sub>4</sub>,  
644 0.33 mM Na<sub>2</sub>HPO<sub>4</sub>, 10 mM glucose, 12 mM NaHCO<sub>3</sub>, 0.5 mM MgCl<sub>2</sub>, and 10 mM HEPES, adjusted to  
645 pH 7.4 with tris(hydroxymethyl)aminomethane. To examine the Na<sup>+</sup> selectivity, extracellular 136 mM  
646 NaCl was substituted with equimolar extracellular LiCl (Na<sup>+</sup>-free ECS). To record ionic currents under  
647 physiological conditions, intracellular solution containing 150 mM KCl, 10 mM HEPES, and 2 mM  
648 magnesium adenosine triphosphate (pH 7.2 by tris(hydroxymethyl)aminomethane) was used.

649

## 650 Computational methods for scRNA-seq data

651 *Quality control, cell clustering and t-SNE visualization:* All analyzes and visualization of data were  
652 conducted in an R environment. Clustering and t-SNE visualization was performed using the R package  
653 'Seurat' (Satija et al., 2015) (v2.3.0). For droplet-based scRNA-seq data, genes expressed in less than  
654 3 cells and cells expressing less than 1000 genes or more than 4500 genes were removed. In addition,  
655 we removed cells expressing more than 2% mitochondrial genes, indicative of dead cells. PCA was  
656 performed on the ~1000 most variable genes after regressing out the number of UMI and the  
657 percentage of mitochondrial genes. Using the 20 most significant principal components (PCs), we  
658 projected individual cells based on their PC scores onto a single two-dimensional map using t-SNE  
659 (Van Der Maaten and Hinton, 2008). Gene expression heatmap along t-SNE2 was obtained by dividing  
660 cells into 40 groups based on their t-SNE2 scores, averaging gene expression within each group and  
661 scaling expression values by column. For Fluidigm C1 data, we excluded chambers containing no cells,  
662 multiple cells or cells exhibiting morphological features of cell death based on visual inspection using  
663 the IN Cell Analyzer 6000 (GE Healthcare). Additionally, cells expressing either of the two housekeeping  
664 genes Actb and Gapdh (encoding  $\beta$ -actin and glyceraldehyde-3-phosphate dehydrogenase,  
665 respectively) at less than three standard deviations below the mean were scored as unhealthy and  
666 removed. After applying these filters, 78 fibroblasts, 216 cells for the time-point 9 dpi (87 Ci and 129  
667 TFi) and 152 cells for the time-point 21 dpi (15 Ci and 137 TFi) remained, yielding 446 cells in total.  
668 Genes expressed in less than 3 cells were removed. PCA was performed on the ~5000 most variable  
669 genes. Using the 5 most significant principal components (PCs), we projected individual cells based on

670 their PC scores onto a single two-dimensional map using t-SNE. Hierarchical clustering was performed  
671 on cells and on PCA scores using Euclidean distance metric.

672 *Differential expression test and GO analysis:* Marker genes of each cluster were determined using a  
673 likelihood ratio test based on zero-inflated data ( $p < 1e-4$ ). We used marker genes which showed, on  
674 average, at least 3-fold and 2-fold enrichment (droplet-based scRNA-seq data and Fluidigm C1 data,  
675 respectively) in a cluster compared to all other clusters. GO analysis was performed using the  
676 PANTHER data base (<http://www.pantherdb.org/>) which uses Fisher's Exact tests with FDR multiple  
677 test correction.

678 *Construction of cellular network:* The cellular network was constructed by computing a pairwise  
679 correlation matrix of all cells in our time-course data and the primary cortical and medial ganglionic  
680 eminence cells (Nowakowski et al., 2017). Next, we generated a weighted adjacency network graph  
681 using the perfuse force-directed layout in Cytoscape and visualized cells as nodes connected to other  
682 cells via edges if the Pearson pairwise correlation between two cells was  $\geq 0.4$ .

683 *Pseudotemporal ordering:* Pseudotemporal ordering of cells was performed using the R package  
684 'Monocle' (Trapnell et al., 2014) (v2.2.0). For unsupervised ordering, we used genes differentially  
685 expressed between cells at day 0 (fibroblasts) and Ci and TFi at day 9 and day 21 ( $qval < 0.1$ ;  $\sim 10^4$  genes). To determine genes that are significantly branch-dependent ( $p < 10^{-4}$ ), we applied the BEAM  
686 algorithm. GO analysis for branch-dependent genes was performed using genes that met the following  
687 criteria: 1)  $p < 0.01$  in a likelihood ratio test based on zero-inflated data; 2) absolute  $\log_2$  fold changes  
688 between the branch under consideration and others were larger than 2. GO analysis for genes that  
689 changed significantly as a function of pseudotime was performed using genes that met the following  
690 criteria: 1)  $p < 10^{-4}$  of differentialGeneTest; 2) among the top 1000 genes showing positive or negative  
691 correlation with pseudotime values. For semi-supervised ordering, we used  $\sim 3000$  genes previously  
692 implicated in nervous system development (GO:0007399), circulatory system development  
693 (GO:0072359), urogenital system development (GO:0001655), heart development (GO:0007507),  
694 mesenchyme development (GO:0060485), ear development (GO:0043583), muscle structure  
695 development (GO:0061061), stem cell development (GO:0048864), pancreas development  
696 (GO:0031016) and skeletal system development (GO:0001501). GO analysis was performed using  
697 genes that met the following criteria: 1)  $p < 0.01$  in a likelihood ratio test based on zero-inflated data;  
698 2) absolute  $\log_2$  fold changes between the branch under consideration and others were larger than 2.  
699

700 To determine exogenous transcription factors that are significantly branch dependent, expression  
701 values were binarized (0 = not expressed, 1 = expressed). Then we performed Fisher's exact tests to  
702 calculate the significance of association of a given exogenous TF with each cluster. Exogenous  
703 transcription factors with  $p < 0.05$  were considered significantly enriched.

704 *GRN assembly*: To construct neuronal subtype-specific GRNs, we calculated the significance of  
705 association of each exogenous transcription factors with all other genes using Fisher's exact tests.  
706 Exogenous TFs were attributed to neuronal subtype-specific GRNs based on the following criteria: 1)  $p$   
707  $< 0.05$  in Fisher's exact test; 2) at least 3 edges to 3 neuronal subtype-specific genes. GRNs were  
708 visualized with Cytoscape using the organic layout.

709 *Combination score*: The CS represents the  $-\log_{10}$ -transformed  $p$ -value of the significance (Mann-  
710 Whitney U test) of increased gene expression in cells containing at least 2 of the predicted exogenous  
711 transcription factors in a network compared to all other cells.

712

## 713 Statistics

714 Statistical analyses were performed using R and detailed in the corresponding figure legends. All  
715 Student's  $t$ -tests are two-sided.

716

## 717 Code availability

718 All analysis code used in this study is available upon request. Custom code for the main analytical steps  
719 will be uploaded on GitHub at the day of publication.

720

## 721 Data availability

722 All sequence data used in this study have been deposited in the NCBI Gene Expression Omnibus  
723 database and will be accessible through accession number GSE117075 upon publication.

724

725

726

727

728

729



## 730 **References**

- 731 Adamson, B., Norman, T.M., Jost, M., Cho, M.Y., Nunez, J.K., Chen, Y., Villalta, J.E., Gilbert, L.A.,  
732 Horlbeck, M.A., Hein, M.Y., et al. (2016). A Multiplexed Single-Cell CRISPR Screening Platform  
733 Enables Systematic Dissection of the Unfolded Protein Response. *Cell* *167*, 1867–1882 e21.
- 734 Berninger, B., Costa, M.R., Koch, U., Schroeder, T., Sutor, B., Grothe, B., and Gotz, M. (2007).  
735 Functional Properties of Neurons Derived from In Vitro Reprogrammed Postnatal Astroglia. *J.*  
736 *Neurosci.* *27*, 8654–8664.
- 737 Bray, N.L., Pimentel, H., Melsted, P., and Pachter, L. (2016). Near-optimal probabilistic RNA-seq  
738 quantification. *Nat Biotechnol* *34*, 525–527.
- 739 Butler, A., Hoffman, P., Smibert, P., Papalexi, E., and Satija, R. (2018). A n a l y s i s Integrating  
740 single-cell transcriptomic data across different conditions , technologies , and species. *36*.
- 741 Caiazzo, M., Dell’Anno, M.T., Dvoretzkova, E., Lazarevic, D., Taverna, S., Leo, D., Sotnikova, T.D.,  
742 Menegon, A., Roncaglia, P., Colciago, G., et al. (2011). Direct generation of functional dopaminergic  
743 neurons from mouse and human fibroblasts. *Nature* *476*, 224–227.
- 744 Chanda, S., Ang, C.E., Davila, J., Pak, C., Mall, M., Lee, Q.Y., Ahlenius, H., Jung, S.W., Sudhof, T.C.,  
745 and Wernig, M. (2014). Generation of induced neuronal cells by the single reprogramming factor  
746 ASCL1. *Stem Cell Reports* *3*, 282–296.
- 747 Chapouton, P., Gartner, A., and Gotz, M. (1999). The role of Pax6 in restricting cell migration between  
748 developing cortex and basal ganglia. *Development* *126*, 5569–5579.
- 749 Chen, S., Sanjana, N.E., Zheng, K., Shalem, O., Lee, K., Shi, X., Scott, D.A., Song, J., Pan, J.Q.,  
750 Weissleder, R., et al. (2015). Genome-wide CRISPR screen in a mouse model of tumor growth and  
751 metastasis. *Cell* *160*, 1246–1260.
- 752 Dixit, A., Parnas, O., Li, B., Chen, J., Fulco, C.P., Jerby-Arnon, L., Marjanovic, N.D., Dionne, D.,  
753 Burks, T., Raychowdhury, R., et al. (2016). Perturb-Seq: Dissecting Molecular Circuits with Scalable  
754 Single-Cell RNA Profiling of Pooled Genetic Screens. *Cell* *167*, 1853–1866 e17.
- 755 Galili, T. (2015). Data and text mining dendextend : an R package for visualizing , adjusting and  
756 comparing trees of hierarchical clustering. *31*, 3718–3720.
- 757 Gascon, S., Masserdotti, G., Russo, G.L., and Gotz, M. (2017). Direct Neuronal Reprogramming:  
758 Achievements, Hurdles, and New Roads to Success. *Cell Stem Cell* *21*, 18–34.
- 759 Heinrich, C., Blum, R., Gascón, S., Masserdotti, G., Tripathi, P., Sánchez, R., Tiedt, S., Schroeder, T.,  
760 Götz, M., and Berninger, B. (2010). Directing astroglia from the cerebral cortex into subtype specific  
761 functional neurons. *PLoS Biol.* *8*.
- 762 Hsu, P.D., Lander, E.S., and Zhang, F. (2014). Development and applications of CRISPR-Cas9 for  
763 genome engineering. *Cell* *157*, 1262–1278.
- 764 Hu, W., Qiu, B., Guan, W., Wang, Q., Wang, M., Li, W., Gao, L., Shen, L., Huang, Y., Xie, G., et al.  
765 (2015). Direct Conversion of Normal and Alzheimer’s Disease Human Fibroblasts into Neuronal Cells  
766 by Small Molecules. *Cell Stem Cell* *17*, 204–212.
- 767 Jaitin, D.A., Weiner, A., Yofe, I., Lara-Astiaso, D., Keren-Shaul, H., David, E., Salame, T.M., Tanay,  
768 A., van Oudenaarden, A., and Amit, I. (2016). Dissecting Immune Circuits by Linking CRISPR-Pooled  
769 Screens with Single-Cell RNA-Seq. *Cell* *167*, 1883–1896 e15.

770 Jeff, G., Schnapp, B.J., and Sheetz, M.P. (1988). © 198 8 Nature Publishing Group. *Nature* 331, 450.  
771 Jiang, H., Xu, Z., Zhong, P., Ren, Y., Liang, G., Schilling, H.A., Hu, Z., Zhang, Y., Wang, X., Chen, S.,  
772 et al. (2015). Cell cycle and p53 gate the direct conversion of human fibroblasts to dopaminergic  
773 neurons. *Nat. Commun.* 6, 1–14.  
774 Kallur, T., Gisler, R., Lindvall, O., and Kokaia, Z. (2008). Pax6 promotes neurogenesis in human  
775 neural stem cells. *Mol Cell Neurosci* 38, 616–628.  
776 Kim, J., Su, S.C., Wang, H., Cheng, A.W., Cassady, J.P., Lodato, M.A., Lengner, C.J., Chung, C.Y.,  
777 Dawlaty, M.M., Tsai, L.H., et al. (2011). Functional integration of dopaminergic neurons directly  
778 converted from mouse fibroblasts. *Cell Stem Cell* 9, 413–419.  
779 Langmead, B., Trapnell, C., Pop, M., and Salzberg, S.L. (2009). Ultrafast and memory-efficient  
780 alignment of short DNA sequences to the human genome. *Genome Biol* 10, R25.  
781 Li, X., Zuo, X., Jing, J., Ma, Y., Wang, J., Liu, D., Zhu, J., Du, X., Xiong, L., Du, Y., et al. (2015).  
782 Small-Molecule-Driven Direct Reprogramming of Mouse Fibroblasts into Functional Neurons. *Cell*  
783 *Stem Cell* 17, 195–203.  
784 Li, X.J., Du, Z.W., Zarnowska, E.D., Pankratz, M., Hansen, L.O., Pearce, R.A., and Zhang, S.C.  
785 (2005). Specification of motoneurons from human embryonic stem cells. *Nat Biotechnol* 23, 215–221.  
786 Liu, M.L., Zang, T., Zou, Y., Chang, J.C., Gibson, J.R., Huber, K.M., and Zhang, C.L. (2013). Small  
787 molecules enable neurogenin 2 to efficiently convert human fibroblasts into cholinergic neurons. *Nat*  
788 *Commun* 4, 2183.  
789 Liu, M.L., Zang, T., and Zhang, C.L. (2016). Direct Lineage Reprogramming Reveals Disease-Specific  
790 Phenotypes of Motor Neurons from Human ALS Patients. *Cell Rep.* 14, 115–128.  
791 Liu, X., Li, F., Stubblefield, E.A., Blanchard, B., Richards, T.L., Larson, G.A., He, Y., Huang, Q., Tan,  
792 A.C., Zhang, D., et al. (2012). Direct reprogramming of human fibroblasts into dopaminergic neuron-  
793 like cells. *Cell Res.* 22, 321–332.  
794 Liu, Y., Yu, C., Daley, T.P., Wong, W.H., Wernig, M., and Qi, L.S. (2018). Resource CRISPR  
795 Activation Screens Systematically Identify Factors that Drive Neuronal Fate and Resource CRISPR  
796 Activation Screens Systematically Identify Factors that Drive Neuronal Fate and Reprogramming.  
797 *Stem Cell* 23, 758–771.e8.  
798 Van Der Maaten, L.J.P., and Hinton, G.E. (2008). Visualizing high-dimensional data using t-sne. *J.*  
799 *Mach. Learn. Res.* 9, 2579–2605.  
800 Masserdotti, G., Gascon, S., and Gotz, M. (2016). Direct neuronal reprogramming: learning from and  
801 for development. *Development* 143, 2494–2510.  
802 Mazzone, E.O., Mahony, S., Closser, M., Morrison, C.A., Nedelec, S., Williams, D.J., An, D., Gifford,  
803 D.K., and Wichterle, H. (2013). Synergistic binding of transcription factors to cell-specific enhancers  
804 programs motor neuron identity. *Nat. Neurosci.* 16, 1219–1227.  
805 Mertens, J., Paquola, A.C.M., Ku, M., Hatch, E., Böhnke, L., Ladjevardi, S., McGrath, S., Campbell,  
806 B., Lee, H., Herdy, J.R., et al. (2015). Directly Reprogrammed Human Neurons Retain Aging-  
807 Associated Transcriptomic Signatures and Reveal Age-Related Nucleocytoplasmic Defects. *Cell Stem*  
808 *Cell* 17, 705–718.  
809 Nowakowski, T.J., Bhaduri, A., Pollen, A.A., Alvarado, B., Mostajo-Radji, M.A., Di Lullo, E., Haeussler,

810 M., Sandoval-Espinosa, C., Liu, S.J., Velmeshev, D., et al. (2017). Spatiotemporal gene expression  
811 trajectories reveal developmental hierarchies of the human cortex. *Science* (80- ). 358, 1318–1323.

812 Pang, Z.P., Yang, N., Vierbuchen, T., Ostermeier, A., Fuentes, D.R., Yang, T.Q., Citri, A., Sebastiano,  
813 V., Marro, S., Sudhof, T.C., et al. (2011). Induction of human neuronal cells by defined transcription  
814 factors. *Nature* 476, 220–223.

815 Pfisterer, U., Kirkeby, A., Torper, O., Wood, J., Nelander, J., Dufour, A., Bjorklund, A., Lindvall, O.,  
816 Jakobsson, J., and Parmar, M. (2011). Direct conversion of human fibroblasts to dopaminergic  
817 neurons. *Proc. Natl. Acad. Sci.* 108, 10343–10348.

818 Picelli, S., Faridani, O.R., Bjorklund, A.K., Winberg, G., Sagasser, S., and Sandberg, R. (2014). Full-  
819 length RNA-seq from single cells using Smart-seq2. *Nat Protoc* 9, 171–181.

820 Rackham, O.J., Firas, J., Fang, H., Oates, M.E., Holmes, M.L., Knaupp, A.S., Consortium, F., Suzuki,  
821 H., Nefzger, C.M., Daub, C.O., et al. (2016). A predictive computational framework for direct  
822 reprogramming between human cell types. *Nat Genet* 48, 331–335.

823 Ramskold, D., Luo, S., Wang, Y.C., Li, R., Deng, Q., Faridani, O.R., Daniels, G.A., Khrebtkova, I.,  
824 Loring, J.F., Laurent, L.C., et al. (2012). Full-length mRNA-Seq from single-cell levels of RNA and  
825 individual circulating tumor cells. *Nat Biotechnol* 30, 777–782.

826 Robinson, M.D., Mccarthy, D.J., and Smyth, G.K. (2010). edgeR : a Bioconductor package for  
827 differential expression analysis of digital gene expression data. 26, 139–140.

828 Ryoji Amamoto, and Arlotta, P. (2014). Development-Inspired Reprogramming of the Mammalian  
829 Central Nervous System. *Science* (80- ). 343.

830 Satija, R., Farrell, J.A., Gennert, D., Schier, A.F., and Regev, A. (2015). Spatial reconstruction of  
831 single-cell gene expression data. *Nat. Biotechnol.* 33, 495–502.

832 Schuurmans, C., and Guillemot, F. (2002). Molecular mechanisms underlying cell fate specification in  
833 the developing telencephalon. *Curr. Opin. Neurobiol.* 12, 26–34.

834 Shalem, O., Sanjana, N.E., and Zhang, F. (2015). High-throughput functional genomics using  
835 CRISPR-Cas9. *Nat. Rev. Genet.* 16, 299–311.

836 Shannon, P., Markiel, A., Ozier, O., Baliga, N.S., Wang, J.T., Ramage, D., Amin, N., Schwikowski, B.,  
837 and Ideker, T. (2003). Cytoscape: a software environment for integrated models of biomolecular  
838 interaction networks. *Genome Res* 13, 2498–2504.

839 Shin, J.W., Suzuki, T., Ninomiya, N., Kishima, M., Hasegawa, Y., Kubosaki, A., Yabukami, H.,  
840 Hayashizaki, Y., and Suzuki, H. (2012). Establishment of single-cell screening system for the rapid  
841 identification of transcriptional modulators involved in direct cell reprogramming. *Nucleic Acids Res*  
842 40, e165.

843 Smith, D.K., Yang, J., Liu, M.L., and Zhang, C.L. (2016). Small Molecules Modulate Chromatin  
844 Accessibility to Promote NEUROG2-Mediated Fibroblast-to-Neuron Reprogramming. *Stem Cell*  
845 *Reports* 7, 955–969.

846 Son, E.Y., Ichida, J.K., Wainger, B.J., Toma, J.S., Rafuse, V.F., Woolf, C.J., and Eggan, K. (2011).  
847 Conversion of mouse and human fibroblasts into functional spinal motor neurons. *Cell Stem Cell* 9,  
848 205–218.

849 Stoykova, A., Treichel, D., Hallonet, M., and Gruss, P. (2000). Pax6 modulates the dorsoventral

850 patterning of the mammalian telencephalon. *J Neurosci* 20, 8042–8050.

851 Thoma, E.C., Wischmeyer, E., Offen, N., Maurus, K., Sirén, A.L., Schartl, M., and Wagner, T.U.

852 (2012). Ectopic expression of neurogenin 2 alone is sufficient to induce differentiation of embryonic

853 stem cells into mature neurons. *PLoS One* 7.

854 Trapnell, C., Cacchiarelli, D., Grimsby, J., Pokharel, P., Li, S., Morse, M., Lennon, N.J., Livak, K.J.,

855 Mikkelsen, T.S., and Rinn, J.L. (2014). The dynamics and regulators of cell fate decisions are

856 revealed by pseudotemporal ordering of single cells. *Nat Biotechnol* 32, 381–386.

857 Treutlein, B., Lee, Q.Y., Camp, J.G., Mall, M., Koh, W., Shariati, S.A., Sim, S., Neff, N.F., Skotheim,

858 J.M., Wernig, M., et al. (2016). Dissecting direct reprogramming from fibroblast to neuron using single-

859 cell RNA-seq. *Nature* 534, 391–395.

860 Tsunemoto, R., Lee, S., Szűcs, A., Chubukov, P., Sokolova, I., Blanchard, J.W., Eade, K.T.,

861 Bruggemann, J., Wu, C., Torkamani, A., et al. (2018). Diverse reprogramming codes for neuronal

862 identity. *Nature*.

863 Victor, M.B., Richner, M., Hermanstyn, T.O., Ransdell, J.L., Sobieski, C., Deng, P.Y., Klyachko, V.A.,

864 Nerbonne, J.M., and Yoo, A.S. (2014). Generation of human striatal neurons by microRNA-dependent

865 direct conversion of fibroblasts. *Neuron* 84, 311–323.

866 Vierbuchen, T., and Wernig, M. (2011). Direct lineage conversions: unnatural but useful? *Nat*

867 *Biotechnol* 29, 892–907.

868 Vierbuchen, T., Ostermeier, A., Pang, Z.P., Kokubu, Y., Südhof, T.C., and Wernig, M. (2010). Direct

869 conversion of fibroblasts to functional neurons by defined factors. *Nature* 463, 1035–1041.

870 Wapinski, O.L., Vierbuchen, T., Qu, K., Lee, Q.Y., Chanda, S., Fuentes, D.R., Giresi, P.G., Ng, Y.H.,

871 Marro, S., Neff, N.F., et al. (2013). XHierarchical mechanisms for direct reprogramming of fibroblasts

872 to neurons. *Cell* 155, 621–635.

873 Wickham, H. (2007). Reshaping Data with the reshape Package. 21.

874 Xu, Z., Jiang, H., Zhong, P., Yan, Z., Chen, S., and Feng, J. (2016). Direct conversion of human

875 fibroblasts to induced serotonergic neurons. *Mol. Psychiatry* 21, 62–70.

876 Xue, Y., Ouyang, K., Huang, J., Zhou, Y., Ouyang, H., Li, H., Wang, G., Wu, Q., Wei, C., Bi, Y., et al.

877 (2013). Direct conversion of fibroblasts to neurons by reprogramming PTB-regulated microRNA

878 circuits. *Cell* 152, 82–96.

879 Yan, Y., Yang, D., Zarnowska, E.D., Du, Z., Werbel, B., Valliere, C., Pearce, R.A., Thomson, J.A., and

880 Zhang, S.C. (2005). Directed differentiation of dopaminergic neuronal subtypes from human

881 embryonic stem cells. *Stem Cells* 23, 781–790.

882 Yun, K., Potter, S., and Rubenstein, J.L. (2001). Gsh2 and Pax6 play complementary roles in

883 dorsoventral patterning of the mammalian telencephalon. *Development* 128, 193–205.

884 Zhang, X., Huang, C.T., Chen, J., Pankratz, M.T., Xi, J., Li, J., Yang, Y., Lavaute, T.M., Li, X.J., Ayala,

885 M., et al. (2010). Pax6 is a human neuroectoderm cell fate determinant. *Cell Stem Cell* 7, 90–100.

886 Zheng, G.X., Terry, J.M., Belgrader, P., Ryvkin, P., Bent, Z.W., Wilson, R., Ziraldo, S.B., Wheeler,

887 T.D., McDermott, G.P., Zhu, J., et al. (2017). Massively parallel digital transcriptional profiling of single

888 cells. *Nat Commun* 8, 14049.

889

# FIGURE 1

## A

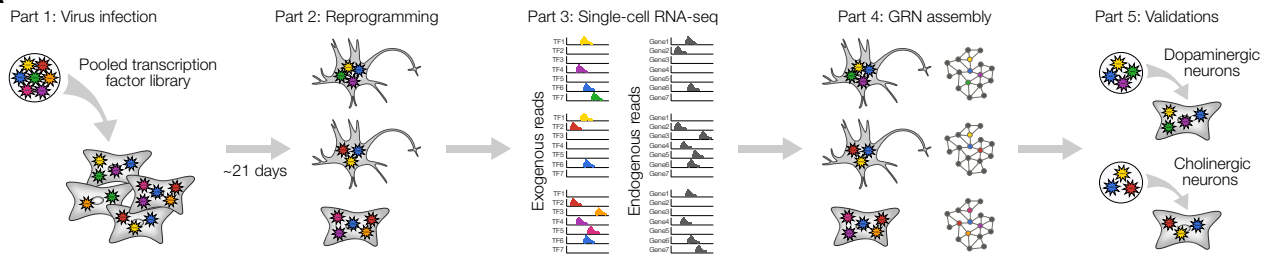

## B

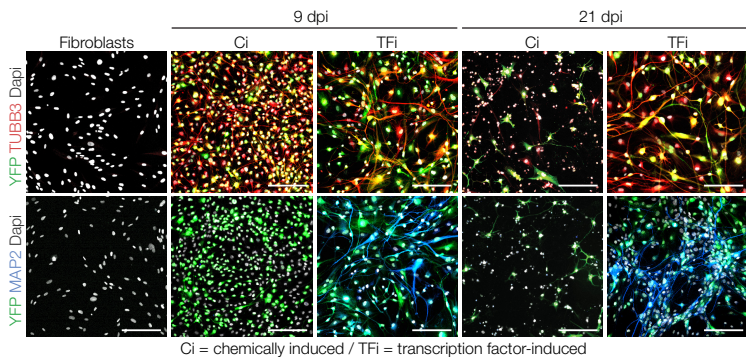

## C

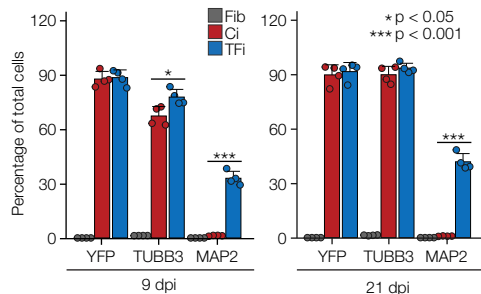

## D

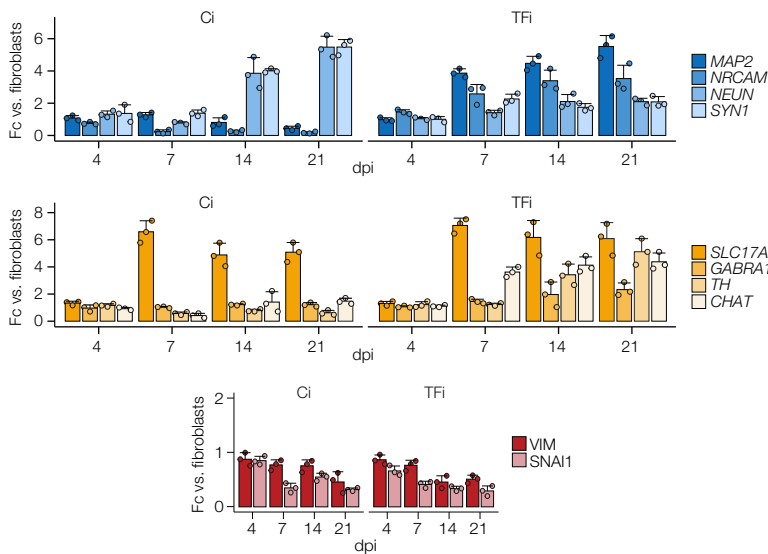

## E

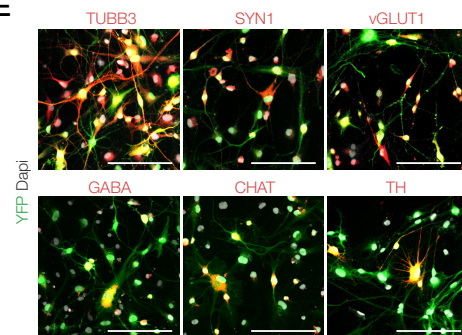

## F

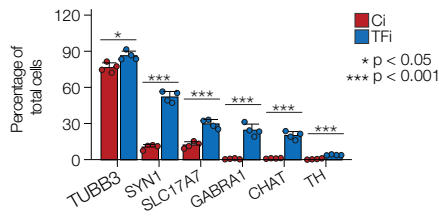



**FIGURE 2**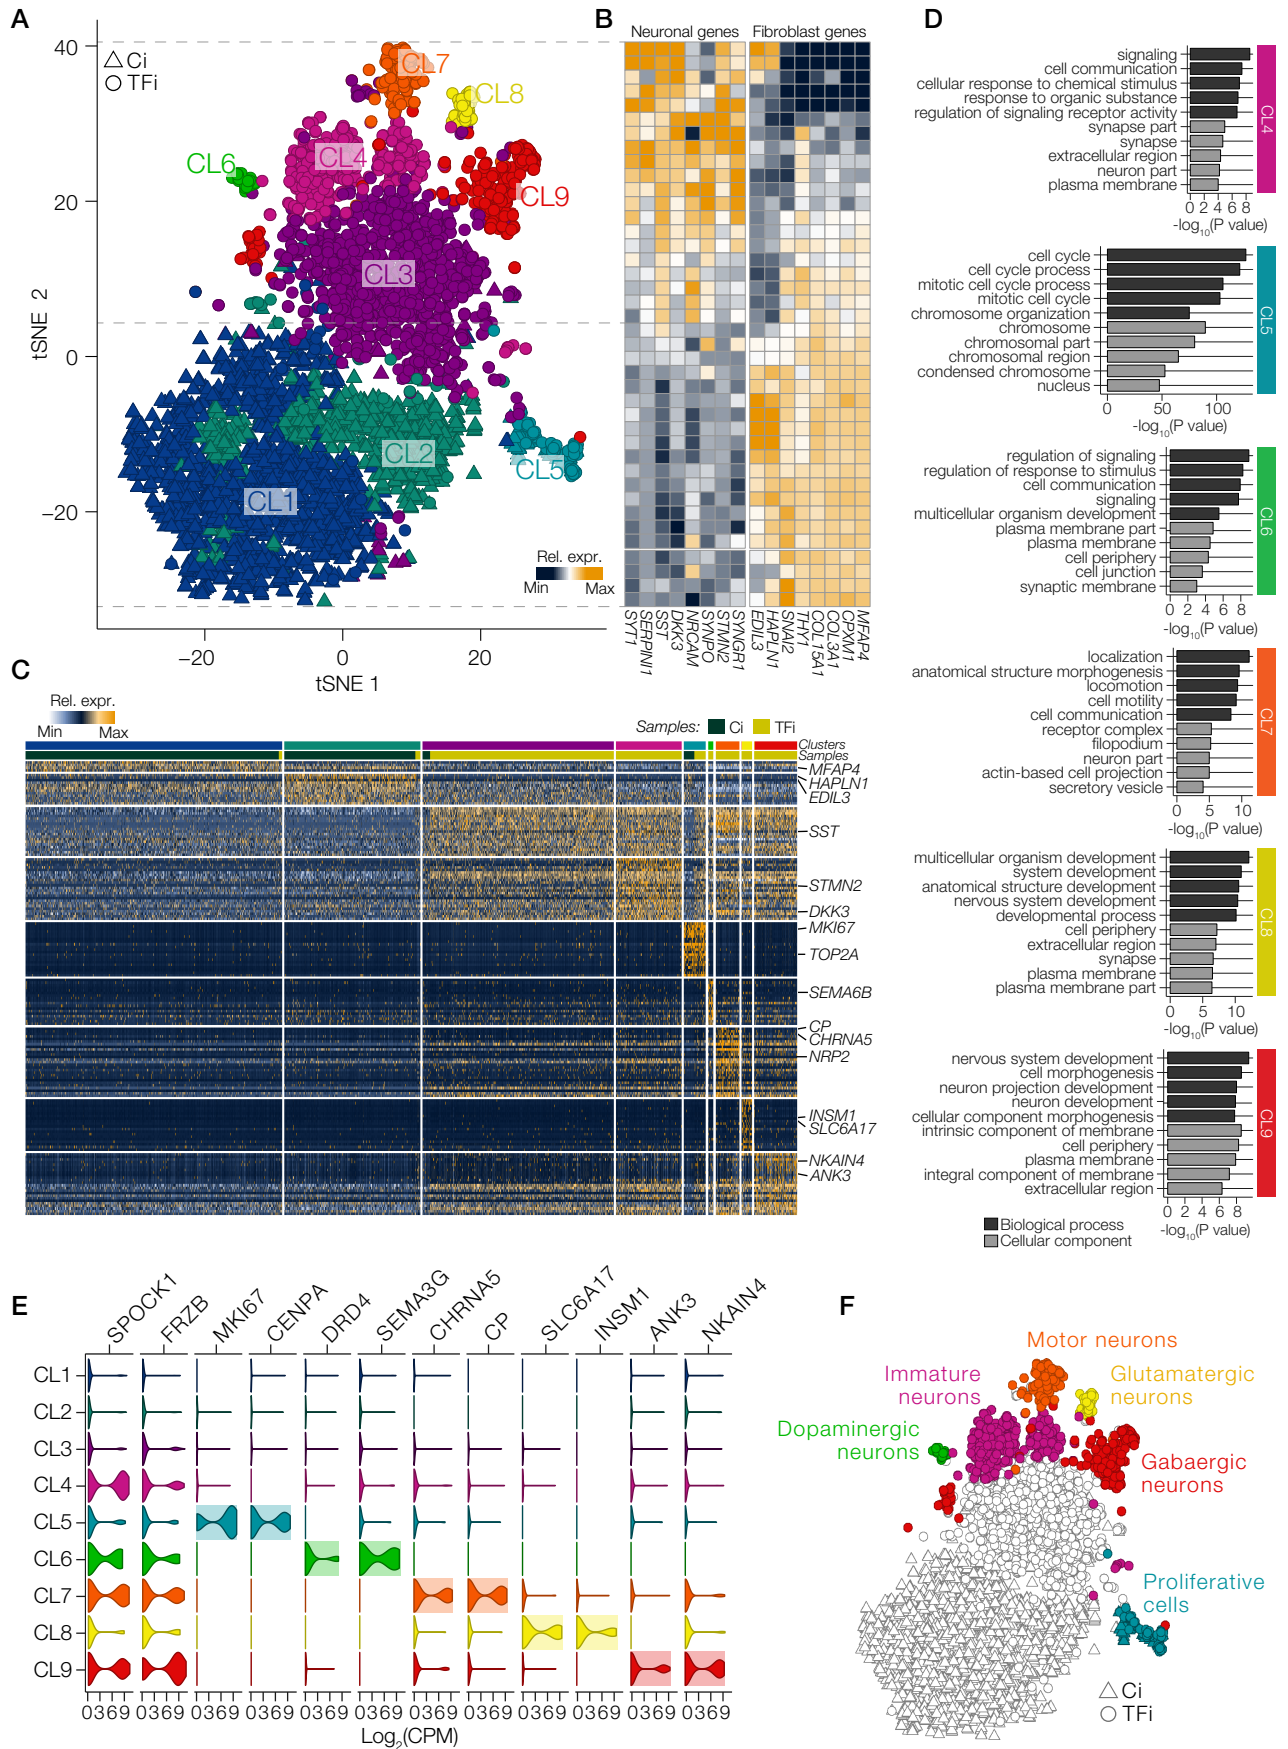

**FIGURE 3****A**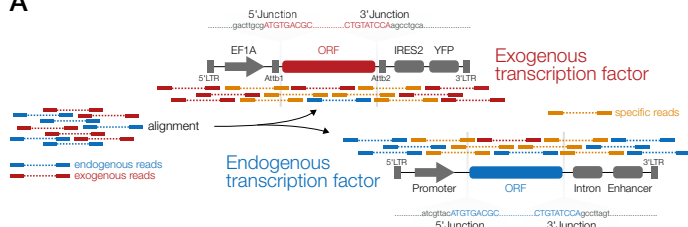**B**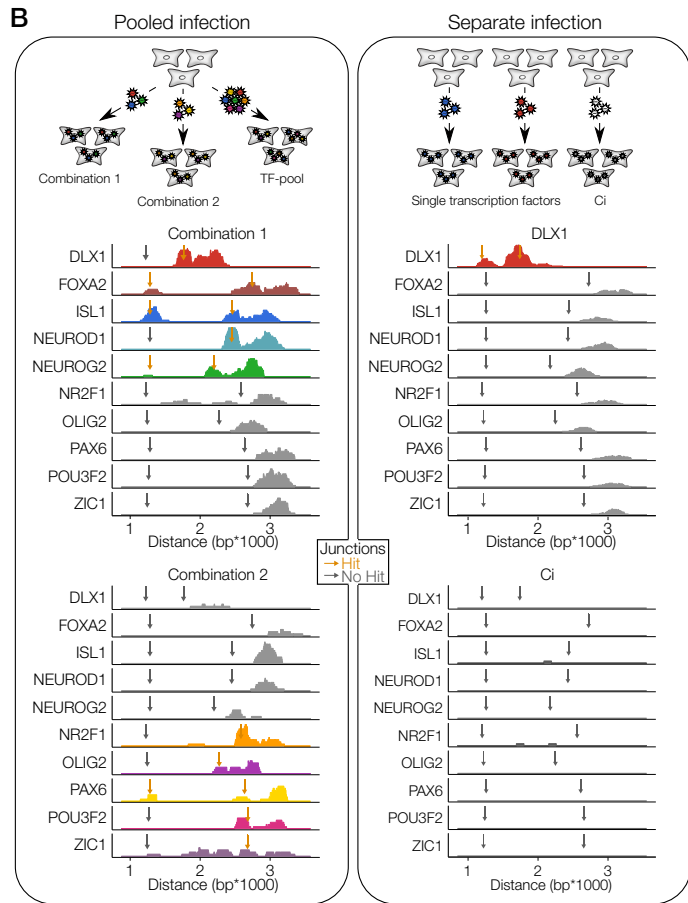**C**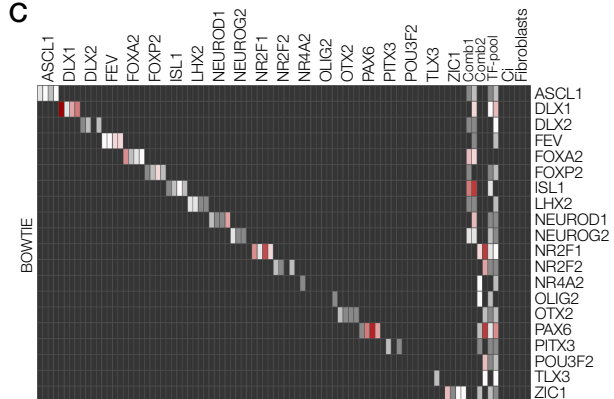**D**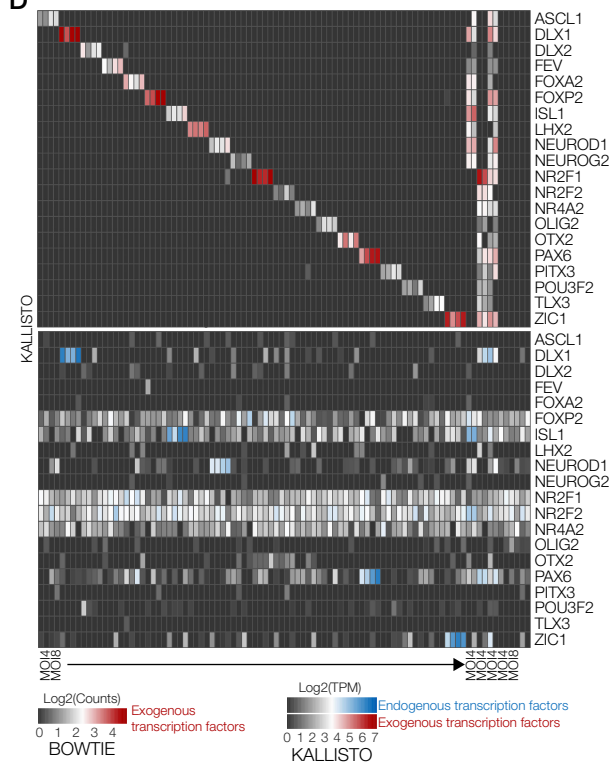**E**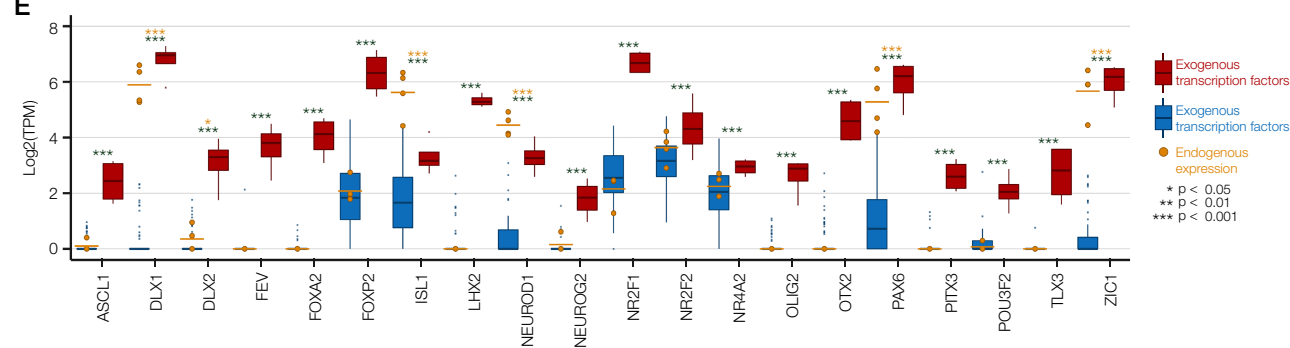



# FIGURE 4

## A

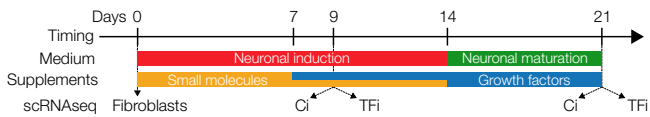

## B

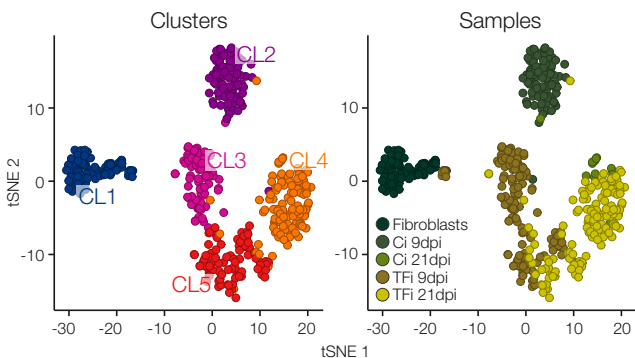

## C

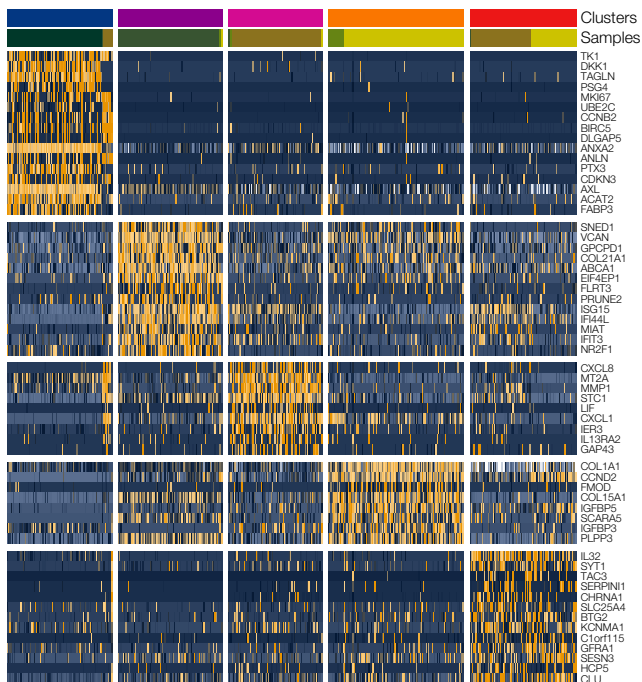

## D

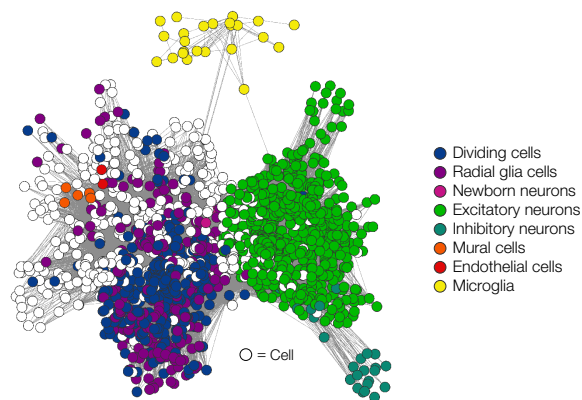

## E

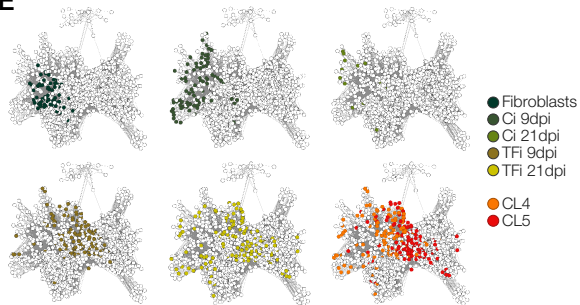

## F

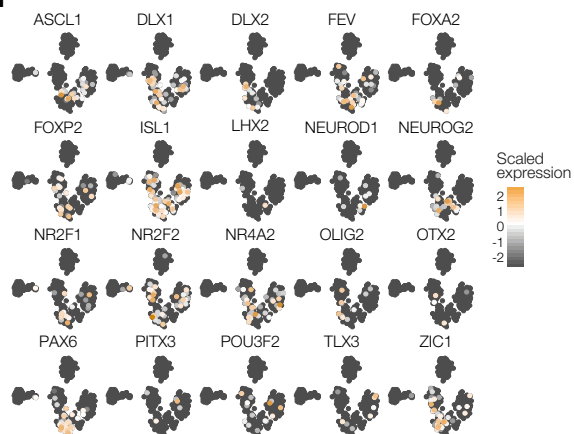

**FIGURE 5**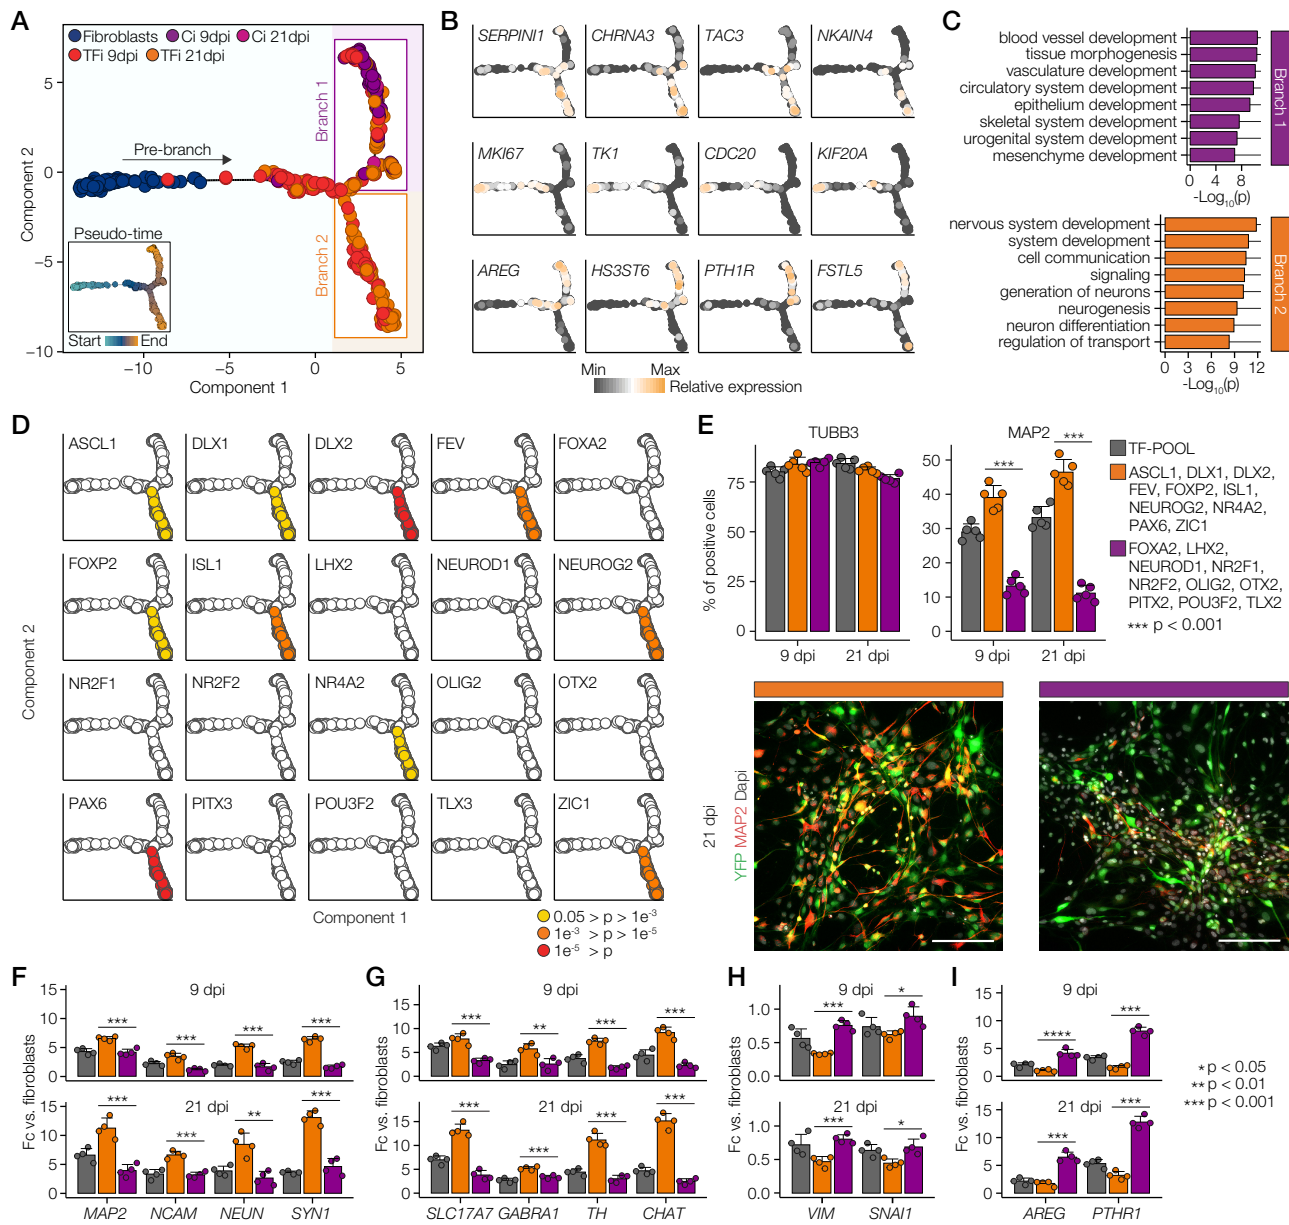

**FIGURE 6**

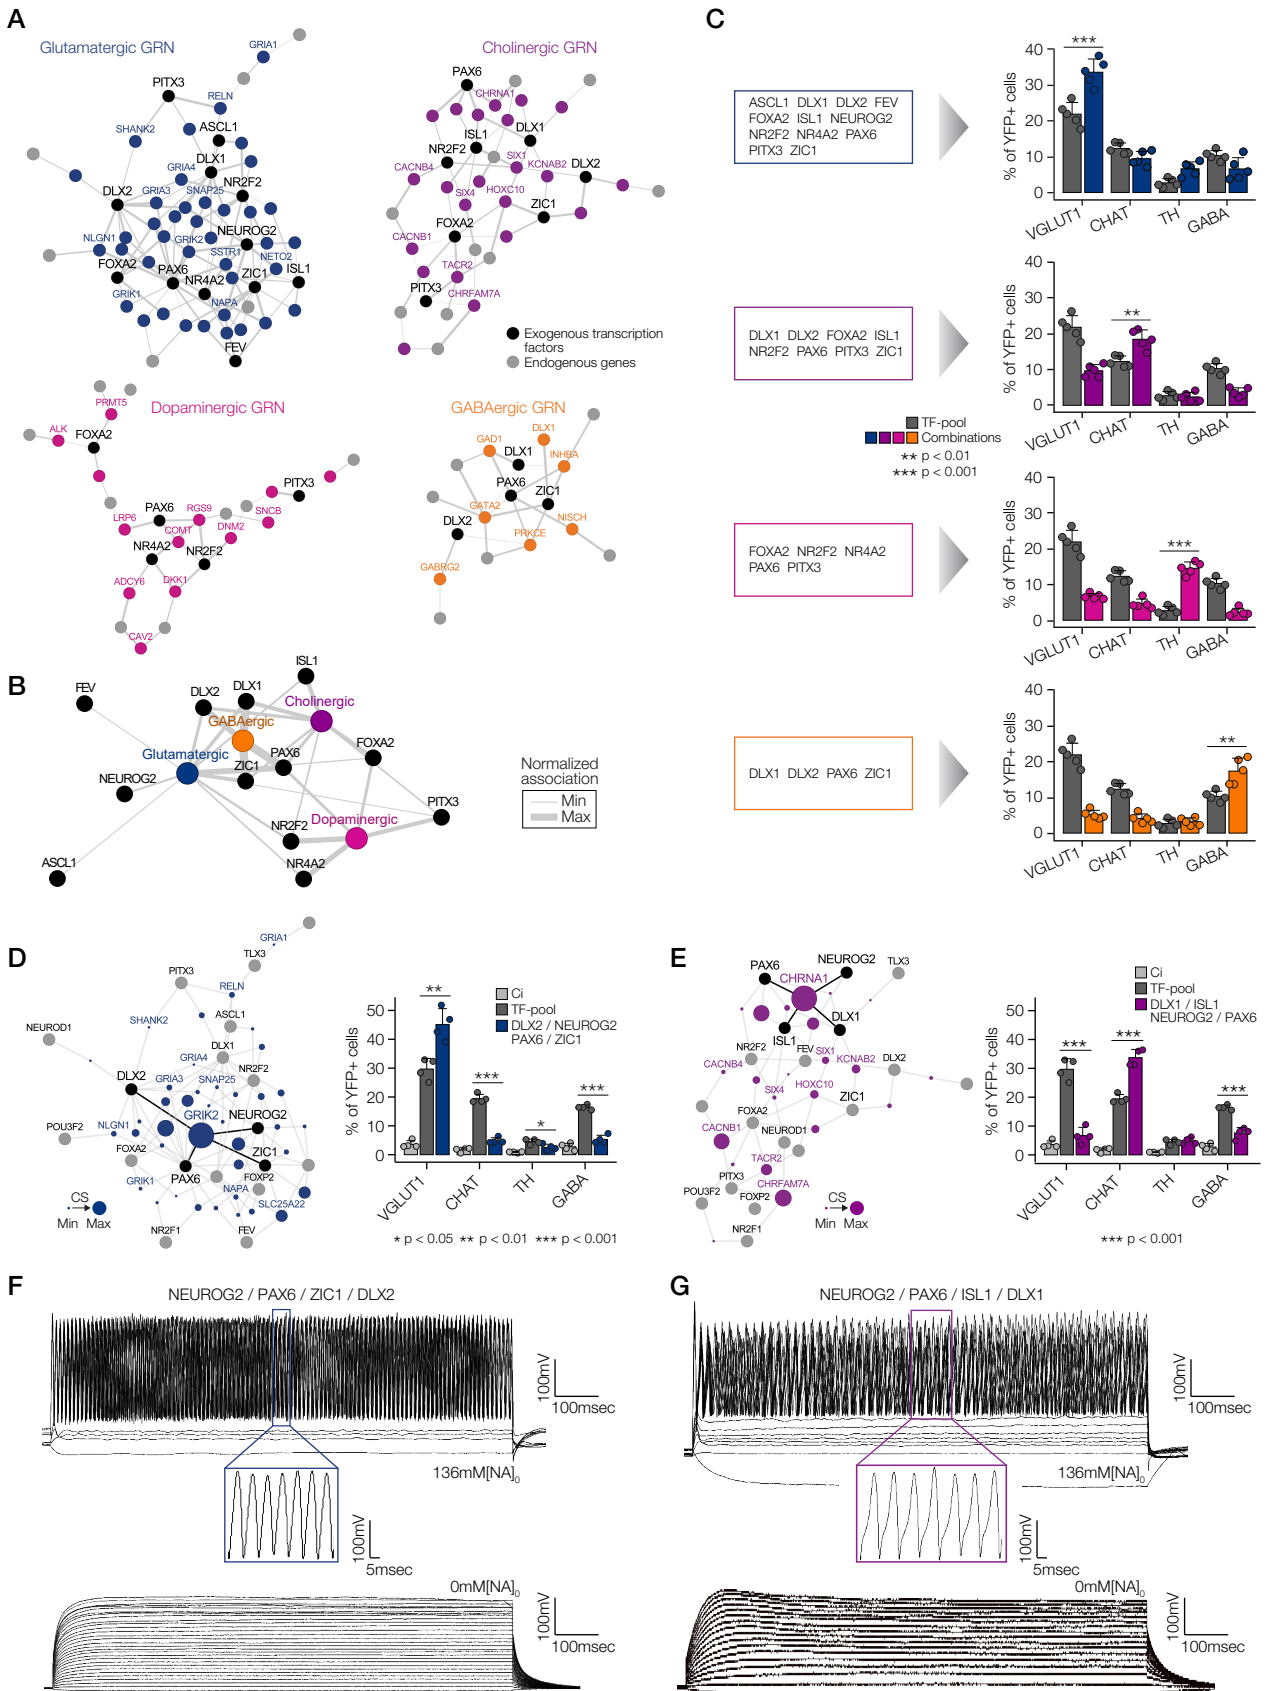

Source: https://biorxiv.org/content/biorxiv/early/2019/04/05/600239.full-text.pdf
